# A theory of multineuronal dimensionality, dynamics and measurement

Peiran Gao<sup>1</sup>, Eric Trautmann<sup>2</sup>, Byron Yu<sup>3</sup>, Gopal Santhanam<sup>4</sup>, Stephen Ryu<sup>5,4</sup>, Krishna Shenoy<sup>4,1,6,7,8,9</sup> and Surya Ganguli<sup>\*10,2,4,8,9</sup>

<sup>1</sup>Department of Bioengineering, Stanford University, Stanford, CA 94305, USA

<sup>2</sup>Neurosciences Program, School of Medicine, Stanford University, Stanford, CA 94305, USA

<sup>3</sup>Department of Electrical Computer Engineering and Biomedical Engineering, Carnegie Mellon University, Pittsburgh, PA 15213, USA

<sup>4</sup>Department of Electrical Engineering, Stanford University, Stanford, CA 94305, USA

<sup>5</sup>Department of Neurosurgery, Palo Alto Medical Foundation, Palo Alto, CA 94301, USA

<sup>6</sup>Department of Neurobiology, School of Medicine, Stanford University, Stanford, CA 94305, USA

<sup>7</sup>Howard Hughes Medical Institute, Stanford University, Stanford, CA 94305, USA

<sup>8</sup>Bio-X Programs, Stanford University, Stanford, CA, 94305, USA

<sup>9</sup>Stanford Neurosciences Institute, Stanford University, Stanford, CA 94305, USA

<sup>10</sup>Department of Applied Physics, Stanford University, Stanford, CA 94305, USA

November 4, 2017

## Abstract

In many experiments, neuroscientists tightly control behavior, record many trials, and obtain trial-averaged firing rates from hundreds of neurons in circuits containing billions of behaviorally relevant neurons. Dimensionality reduction methods reveal a striking simplicity underlying such multi-neuronal data: they can be reduced to a low-dimensional space, and the resulting neural trajectories in this space yield a remarkably insightful dynamical portrait of circuit computation. This simplicity raises profound and timely conceptual questions. What are its origins and its implications for the complexity of neural dynamics? How would the situation change if we recorded more neurons? When, if at all, can we trust dynamical portraits obtained from measuring an infinitesimal fraction of task relevant neurons? We present a theory that answers these questions, and test it using physiological recordings from reaching monkeys. This theory reveals conceptual insights into how task complexity governs both neural dimensionality and accurate recovery of dynamic portraits, thereby providing quantitative guidelines for future large-scale experimental design.

---

\*sganguli@stanford.edu

## 31 1 Introduction

32 In this work, we aim to address a major conceptual elephant residing within almost all studies in mod-  
33 ern systems neurophysiology. Namely, how can we record on the order of hundreds of neurons in regions  
34 deep within the brain, far from the sensory and motor peripheries, like mammalian hippocampus, or pre-  
35 frontal, parietal, or motor cortices, and obtain scientifically interpretable results that relate neural activity  
36 to behavior and cognition? Our apparent success at this endeavor seems absolutely remarkable, consid-  
37 ering such circuits mediating complex sensory, motor and cognitive behaviors contain  $O(10^6)$  to  $O(10^9)$   
38 neurons [Shepherd, 2004] - 4 to 7 orders of magnitude more than we currently record. Or alternatively, we  
39 could be completely misleading ourselves: perhaps we should not trust scientific conclusions drawn from  
40 statistical analyses of so few neurons, as such conclusions might become qualitatively different as we record  
41 more. Without an adequate theory of neural measurement, it is impossible to *quantitatively* adjudicate where  
42 systems neuroscience currently stands between these two extreme scenarios of success and failure.

43 One potential solution is an experimental one: simply wait until we can record more neurons. Indeed,  
44 exciting advances in recording technology over the last several decades have lead to a type of Moore's  
45 law in neuroscience: an exponential growth in the number of neurons we can simultaneously record with a  
46 doubling rate of 7.4 years since the 1960's [Stevenson and Kording, 2011]. Important efforts like the BRAIN  
47 Initiative promise to ensure such growth in the future. However, if we simply extrapolate the doubling rate  
48 achieved over the last 50 years, we will require about 100 to 200 years to record 4 to 7 orders of magnitude  
49 more neurons. Thus, for the near future, it is highly likely that measurements of neural dynamics at single  
50 cell, single spike-time resolution in mammalian circuits controlling complex behaviors will remain in the  
51 highly sub-sampled measurement regime. Therefore we need a theory of neural measurement that addresses  
52 a fundamental question: how and when do statistical analyses applied to an infinitesimally small subset of  
53 neurons reflect the collective dynamics of the much larger, unobserved circuit they are embedded in?

54 Here we provide the beginnings of such a theory, that is quantitatively powerful enough to (a) formu-  
55 late this question with mathematical precision, (b) make well defined, testable predictions that guide the  
56 interpretation of past experiments, and (c) provide a theoretical framework to guide the design of future  
57 large scale recording experiments. We focus in this work on an extremely commonly used experimental  
58 design in which neuroscientists repeat a given behavioral or cognitive task over many trials, and record  
59 the trial averaged neural dynamics of many neurons. An advantage of this design, which has promoted  
60 its widespread usage, is that the neurons need not be simultaneously recorded. This resulting trial average  
61 firing rate dynamics can be thought of as a collection of neural trajectories exploring a high dimensional  
62 neural space, with dimensionality equal to the number of recorded neurons (see e.g. Fig 1 below for a con-  
63 ceptual overview). They reflect a fundamental description of the state space dynamics of the neural circuit  
64 during cognition and behavior. Almost always, such trajectories are analyzed via dimensionality reduction  
65 (see [Cunningham and Yu, 2014] for a review), and almost ubiquitously, a large fraction of variance in these  
66 trajectories lives in a much lower dimensional space.

67 The resulting neural trajectories in the low dimensional space often provide a remarkably insightful dy-  
68 namical portrait of circuit computation during the task in a way that is inaccessible through the analysis  
69 of individual neurons [Briggman et al., 2006]. For example, curvature in the geometry of these dynamical  
70 portraits recovered from macaque prefrontal cortex by [Mante et al., 2013] revealed a novel computational  
71 mechanism for contextually-dependent integration of sensory evidence. Similarly, dimensionality reduction  
72 by [Machens et al., 2010] uncovered dynamical portraits which revealed that macaque somatosensory cor-  
73 tices compute both stimulus frequency and time in a functionally but not anatomically separable manner  
74 in a tactile discrimination task. Dynamical portraits obtained by [Mazor and Laurent, 2005] revealed that  
75 neural transients in insect olfactory areas rapidly computed odor identity long before the circuit settled to

76 a steady state. And an analysis of neural dynamics in macaque parietal cortex showed that the dynamical  
77 portraits were largely one-dimensional, revealing an emergent circuit mechanism for robust timing in atten-  
78 tional switching and decision making [Ganguli et al., 2008a]. Also, the low-dimensional activity patterns  
79 found in primary motor-cortex provide causal constraints learning itself [Sadler et al., 2014].

80 Given the importance of these dynamical portraits as a first window into circuit computation, it is im-  
81 portant to ask if we can trust them despite recording so few neurons? For example, would their geometry  
82 change if we record more neurons? How about their dimensionality? The ubiquitous low dimensionality of  
83 neural recordings suggests an underlying simplicity to neural dynamics; what is its origin? How does the  
84 number of neurons we need to record to accurately recover dynamical portraits scale with the complexity of  
85 the task, and properties of the neural dynamics? Indeed which minimal properties of neural dynamics are  
86 important to know in order to formulate and answer this last question?

87 Our theory provides a complete answer to these questions within the context of trial averaged experimen-  
88 tal design. Central to our theory are two main conceptual advances. The first is the introduction of neural task  
89 complexity (NTC), a mathematically well defined quantity that takes into account both the complexity of  
90 the task, and the smoothness of neural trajectories across task parameters. Intuitively, the NTC measures the  
91 volume of the manifold of task parameters, in units of the length scales over which neural trajectories vary  
92 across task parameters, and it will be small if tasks are very simple and neural trajectories are very smooth.  
93 We prove that this measure upper bounds the dimensionality of neural state space dynamics. This theorem  
94 has important implications for systems neuroscience: it is likely that the ubiquitous low dimensionality of  
95 measured neural state space dynamics is due to a small NTC. In any such scenario, simply recording many  
96 more neurons than the NTC, while repeating the same simple task will not lead to richer, higher dimensional  
97 datasets; indeed data dimensionality will become independent of the number of recorded neurons. One  
98 would have to move to more complex tasks to obtain more complex, higher dimensional dynamical portraits  
99 of circuit computation.

100 The second conceptual advance is a novel theoretical link between the act of neural measurement and a  
101 technique for dimensionality reduction known as random projections. This link allows us to prove that, as  
102 long as neural trajectories are sufficiently randomly oriented in state space, we need only record a number  
103 of neurons proportional to the product of the number of task parameters and the *logarithm* of the NTC. This  
104 theorem again has significant implications for systems neuroscience. Indeed, it quantitatively adjudicates  
105 between the two extremes of success or failure raised above, fortunately, in the direction of success: it  
106 is highly likely that low dimensional dynamical portraits recovered from past experiments are reasonably  
107 accurate despite recording so few neurons, because those tasks were so simple, leading to a small NTC.  
108 Moreover, as we begin to move to more complex tasks, this theorem provides rigorous guidance for how  
109 many more neurons we will need to record in order to accurately recover the resulting more complex, higher  
110 dimensional dynamical portraits of circuit computation.

111 Below, we build up our theory step by step. We first review the process of recovering state space dy-  
112 namical portraits through dimensionality reduction in neuroscience. We then introduce the notion of NTC,  
113 and illustrate how it provides an upper bound on neural dimensionality. Then we review the notion of ran-  
114 dom projections, and illustrate how the NTC of an experiment *also* determines how many neurons we must  
115 record to accurately obtain dynamical portraits. Along the way, we extract a series of experimentally testable  
116 predictions, which we confirm in neural recordings from the motor and premotor cortices of monkeys per-  
117 forming reaches to multiple directions. We end in the discussion with an intuitive summary of our theory  
118 and its implications for the future of large scale recordings in systems neuroscience.

## 119 2 Recovery of neural state space dynamics through dimensionality reduction

120 Imagine an experiment in which a neuroscientist records trial averaged patterns of neural activity from a set  
 121 of  $M$  neurons across time. We denote by  $x_i(t)$  the trial averaged firing rate of neuron  $i$  at time  $t$ . These data  
 122 are often visualized by superimposing the firing rates of each neuron across time (Fig. 1A). Alternatively,  
 123 these data can be thought of as a neural trajectory in an  $M$  dimensional space (Fig. 1B). At each time, the  
 124 measured state of the neural circuit consists of the instantaneous pattern of activity across  $M$  neurons, which  
 125 corresponds to a point in  $M$  dimensional space, where each dimension, or axis in the space corresponds to  
 126 the firing rate of one neuron. As time progresses, this point moves, tracing out the neural trajectory.

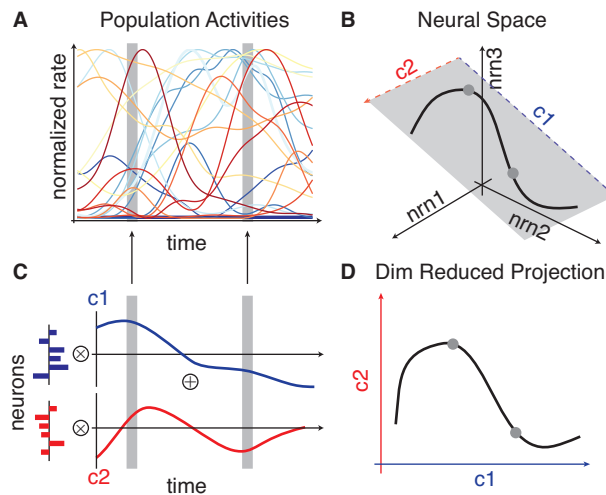

Figure 1: **Conceptual overview of state space dynamics through dimensionality reduction.** (A) The trial averaged firing rate dynamics of  $M$  neurons. (B) This data can be equivalently thought of as tracing out a neural state space trajectory in an  $M$  dimensional firing rate space with one axis per neuron. Here only three of the  $M$  axes are shown, and as illustrated, sometimes such a trajectory can be largely confined to a lower dimensional subspace, here a two dimensional subspace. (C) A decomposition of the data in (A) into two static spatial patterns across neurons (red and blue patterns, left). The population activity pattern at each instant of time is a weighted sum of the two static *basis* patterns, where the weighting coefficients (red and blue traces, right) depend on time. If all population patterns across time can largely be explained by linear combinations of these two patterns, then the neural trajectory corresponding to the data in (A) will be largely confined to explore a two dimensional subspace within  $M$  dimensional firing rate space, shown for example in B. Two special points in the subspace correspond to the two basis patterns in (C), i.e. the endpoints of the two red and blue vectors in (B), and the subspace is spanned by all linear combinations of these two patterns. (D). One can then accurately visualize the state space dynamics in pattern space, by plotting the time-dependent weighting coefficients in (C) against each other. Each axis in pattern space corresponds to how much each basis pattern is present in the neural population.

127 It is difficult to directly understand or visualize this trajectory, as it evolves in such a high-dimensional  
 128 ambient space. Here dimensionality reduction is often used to simplify the picture. The main idea behind  
 129 many linear dimensionality reduction methods is to decompose the entire set of dynamic neural activity  
 130 patterns across neurons, unfolding over time, into a time dependent linear combination of a fixed set of  
 131 static patterns across neurons (Fig. 1C). The hope is that the data can be dramatically simplified if a linear  
 132 combination of a small number of static basis patterns are sufficient to account for a large fraction of variance

133 in the data across time. When this is the case, the neural state space dynamics can unfold over time in a much  
134 lower dimensional pattern space, whose coordinates consist of how much each static pattern is present in the  
135 neural population (Fig. 1D).

136 Mathematically, the decomposition illustrated in Fig. 1C can be written as  $\mathbf{x}_i(t) = \sum_{\alpha=1}^D \mathbf{u}_i^\alpha c_\alpha(t)$ ,  
137 where each  $M$  dimensional vector  $\mathbf{u}^\alpha$  is a static basis pattern across neurons, each  $c_\alpha(t)$  is the amplitude of  
138 that pattern across time (Fig.1C), and  $D$  denotes the number of patterns or dimensions retained. Principal  
139 components analysis (PCA) is a simple way to obtain such a decomposition (see Supplementary Material for  
140 a review). PCA yields a sequence of basis patterns  $\mathbf{u}^\alpha$ ,  $\alpha = 1, \dots, M$  each accounting for a different amount  
141 of variance  $\mu^\alpha$  in the neural population. The patterns can be ordered in decreasing amount of variance  
142 explained, so that  $\mu_1 \geq \mu_2 \geq \dots \geq \mu_M$ . By retaining the top  $D$  patterns, one achieves a fraction of  
143 variance explained given by  $\chi^2 = \frac{1}{\mu_{\text{Tot}}} \sum_{\alpha=1}^D \mu_\alpha$ , where  $\mu^{\text{Tot}} = \sum_{\alpha=1}^M \mu_\alpha$  is the total variance in the neural  
144 population. Dimensionality reduction is considered successful if a small number of patterns  $D$  relative to  
145 number of recorded neurons  $M$ , accounts for a large fraction of variance explained in the neural state space  
146 dynamics.

147 How well does dimensionality reduction perform in practice in neurophysiology data? We have per-  
148 formed a meta-analysis (Fig. 2) of a diverse set of 20 experiments spanning a variety of model organisms  
149 (macaques, rodents, and insects), brain regions (hippocampal, prefrontal, parietal, somatosensory, motor,  
150 premotor, visual, olfactory and brainstem areas), and tasks (memory, decision making, sensory detection  
151 and motor control). This meta-analysis reveals that dimensionality reduction as a method for simplifying  
152 neural population recordings performs exceedingly well. Indeed it reflects one of the most salient aspects of  
153 systems neurophysiology to have emerged over the last couple of decades: namely that neuronal recordings  
154 are often far lower dimensional than the number of recorded neurons. Moreover, in each of these works, the  
155 associated low dimensional dynamical portraits provide insights into relations between neural population  
156 activity and behavior. Despite this almost ubiquitous simplicity found in neural population recordings, prior  
157 to this work, we are unaware of any simple, experimentally testable theory that can quantitatively explain  
158 the dimensionality and accuracy of these recovered dynamical portraits.

### 159 3 Neural Task Complexity and Dimensionality

160 We now begin to describe such a theory. Central to our theory is the notion of neural task complexity  
161 (NTC), which both upper bounds the dimensionality of state space dynamics and quantifies how many  
162 neurons are required to accurately recover this dynamics. Here, we first consider the dimensionality of the  
163 dynamics, and later we consider the accuracy of the dynamics. To introduce the NTC intuitively, imagine  
164 how many dimensions a single neural trajectory could possibly explore. Consider for concreteness, the trial  
165 averaged neural population activity while a monkey is performing a simple reach to a target (Fig. 3AB). This  
166 average reach lasts a finite amount of time  $T$ , which for example could be about 600ms. The corresponding  
167 neural trajectory (Fig. 3C) can explore neural space for this much time, but it cannot change direction  
168 infinitely fast. The population response is limited by an autocorrelation time  $\tau$  (see supplementary methods  
169 for details). Roughly, one has to wait an amount of time  $\tau$  before the neural population's activity pattern  
170 changes appreciably (Fig. 3B) and therefore the neural trajectory can bend to explore another dimension  
171 (Fig. 3C). This implies that the maximal number of dimensions the state space dynamics can possibly  
172 explore is proportional to  $T/\tau$ . Of course the constant of proportionality is crucial, and our theory, applicable  
173 to reaching data described below, computes this constant to be  $\sqrt{\frac{2}{\pi}}$  (see supplementary material for a proof  
174 and a definition of  $\tau$ ), yielding, for this experiment, an  $NTC = \sqrt{\frac{2}{\pi}} \frac{T}{\tau}$ .

175 Now most tasks have more than just time as a parameter. Consider a slightly more complex experiment in

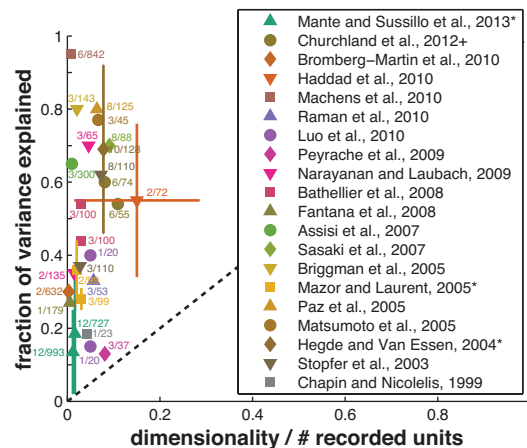

Figure 2: **The ubiquity of low dimensionality relative to number of recorded neurons.** In many experiments (e.g. in insect [Stopfer et al., 2003, Mazor and Laurent, 2005, Assisi et al., 2007, Raman et al., 2010, Haddad et al., 2010] olfactory systems, mammalian olfactory [Bathellier et al., 2008, Haddad et al., 2010], prefrontal [Narayanan and Laubach, 2009, Peyrache et al., 2009, Machens et al., 2010, Warden and Miller, 2010, Mante et al., 2013], motor and premotor, [Paz et al., 2005, Churchland et al., 2012], somatosensory [Chapin and Nicolelis, 1999], visual [Hegde and Van Essen, 2004, Matsumoto et al., 2005], hippocampal [Sasaki et al., 2007], and brain stem [Bromberg-Martin et al., 2010] systems) a *much* smaller number of dimensions than the number of recorded neurons captures a large amount of variance in neural firing rates.

176 which a monkey reaches to 8 different targets (Fig. 3D). Now the manifold of trial averaged task parameters  
 177 is a cylinder, parameterized by time  $t$  into the reach and reach angle  $\theta$  (Fig. 3E). Since for each time  $t$  and  
 178 angle  $\theta$ , there is a corresponding trial averaged neural activity pattern across neurons  $\mathbf{x}_i(\theta, t)$ , the neural state  
 179 space dynamics is fundamentally an embedding of this task manifold into neural space, yielding a curved  
 180 intrinsically two dimensional neural manifold that could potentially explore many more than two dimensions  
 181 in firing rate space by curving in different ways (Fig. 3F). How many dimensions could it possibly explore?  
 182 Well the same argument that we made for time into a reach at fixed angle, also holds for reaching across  
 183 all angles at a fixed time into the reach. The total extent of angle is  $2\pi$ . Moreover, the neural population  
 184 response cannot vary infinitely fast across angle; it has a spatial autocorrelation length  $\Delta$ . Intuitively, this  
 185 means that the two patterns of activity  $\mathbf{x}_i(\theta_1, t)$  and  $\mathbf{x}_i(\theta_2, t)$  across neurons at two different reach angles  $\theta_1$   
 186 and  $\theta_2$  at the same time  $t$  will not be appreciably different unless  $|\theta_i - \theta_j| > \Delta$ . Roughly, one can think of  
 187  $\Delta$  as the average width of single neuron tuning curves across reach angle.

188 Thus, just as in the argument for time, because the total angle to be explored is limited to  $2\pi$ , and patterns  
 189 are largely similar across angular separations less than  $\Delta$ , the maximal number of dimensions a single circle  
 190 around the neural manifold at any fixed time could explore, is proportional to  $\frac{2\pi}{\Delta}$ , where the proportionality  
 191 constant is again  $\sqrt{\frac{2}{\pi}}$ . Now intuitively, the number of dimensions the full neural manifold could explore  
 192 across both time and angle would be maximized if these explorations were independent of each other. Then  
 193 the maximal dimensionality would be the product of  $\sqrt{\frac{2}{\pi}} \frac{T}{\tau}$  and  $\sqrt{\frac{2}{\pi}} \frac{2\pi}{\Delta}$  (see supplementary material for a  
 194 proof), yielding an NTC =  $4 \frac{T}{\tau} \frac{1}{\Delta}$ .

195 More generally, consider a task that has  $K$  task parameters indexed by  $k = 1, \dots, K$ , each of which

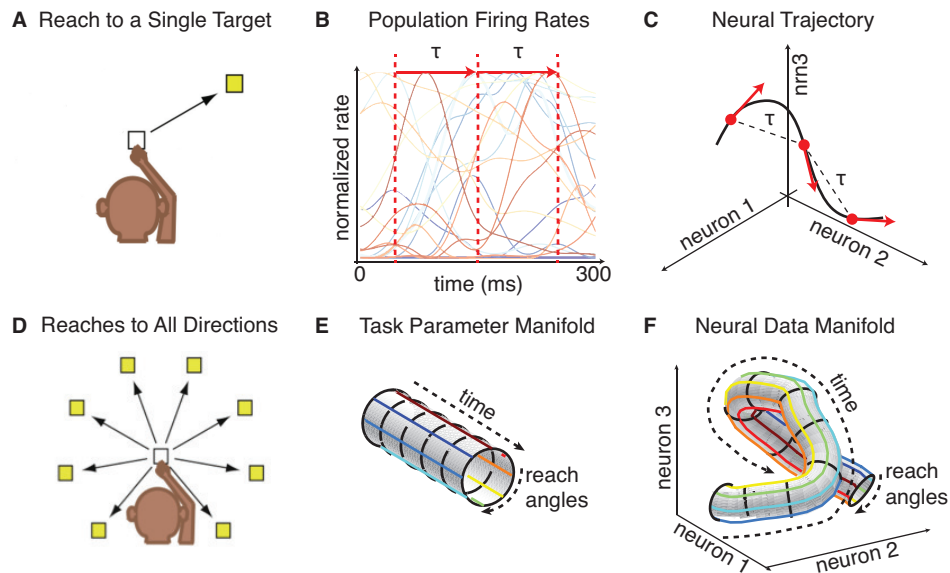

Figure 3: **Trial averaged neurophysiology as an embedding of a task manifold into a neural manifold.** (A) A monkey reaching to a single target. The task is parameterized simply by time  $t$ . (B) Schematic of neuronal firing rate data during the reach, and (C) the associated neural trajectory. (D) A monkey reaching to several targets. (E) The associated task manifold is a cylinder parameterized by time into the reach and reach angle. (F) The neural state space dynamics is a smooth embedding of the task manifold into neural firing rate space.

196 vary over a range  $L_k$ , and for which neural activity patterns have a correlation length  $\lambda_k$ . Then the NTC is

$$\text{NTC} = C \frac{\prod_{k=1}^K L_k}{\prod_{k=1}^K \lambda_k}. \quad (1)$$

197 For example, in the special case of reaches to all angles we have considered so far, we have  $K = 2$ ,  $L_1 = T$ ,  
 198  $\lambda_1 = \tau$ ,  $L_2 = 2\pi$ ,  $\lambda_2 = \Delta$ , and  $C = \frac{2}{\pi}$ . In the general case, our theory (see supplementary material) pro-  
 199 vides a precise method to define the autocorrelation lengths  $\lambda_k$ , in a manner consistent with the intuition that  
 200 a correlation length measures how far one has to move in behavioral manifold, to obtain an appreciably dif-  
 201 ferent pattern of activity across neurons in the neural manifold (Fig. 3EF). Moreover, our theory determines  
 202 the constant of proportionality  $C$ , as well as provides a proof that the neural dimensionality  $D$ , measured  
 203 by the participation ratio of the PCA eigenvalue spectrum (see methods) is less than the minimum of the  
 204 number of recorded neurons  $M$  and the NTC:

$$D \leq \min \{M, \text{NTC}\}. \quad (2)$$

205 Also, in the supplementary material, we consider a much simpler scenario in which there are a finite set of  $P$   
 206 neural activity patterns, for example in response to a finite set of  $P$  stimuli. There, the NTC is simply  $P$ , and  
 207 we compute analytically how measured dimensionality  $D$  increases with number of recorded neurons  $M$ ,  
 208 and how it eventually asymptotes to the NTC if there are no further constraints on the neural representation.  
 209 In the following, however, we focus on the much more interesting case of neural manifolds in (1).

210 We note that the NTC in (1) takes into account two very distinct pieces of information. First, the nu-  
 211 merator only knows about the task design; indeed it is simply the volume of the manifold of task parameters

212 (e.g. Fig. 3E). The denominator on the other hand requires knowledge of the smoothness of the neural  
213 manifold; indeed it is the volume of an autocorrelation cell over which population neural activity does not  
214 change appreciably across *all*  $K$  task parameters. Thus the theorem (2) captures the simple intuition that  
215 neural manifolds of limited volume and curvature (e.g. Fig. 3CF ) cannot explore that many dimensions  
216 (though they could definitely explore fewer than the NTC). However, as we see below the precise theorem  
217 goes far beyond this simple intuition, as it provides a quantitative framework to guide the interpretation of  
218 past experiments and design future ones.

## 219 **4 A Dimensionality Frontier in Motor Cortical Data**

220 To illustrate the interpretative power of the NTC, we re-examined the measured dimensionality of neural  
221 activity from the motor and premotor cortices of two monkeys, H and G, recorded in [Yu et al., 2007],  
222 during an eight-direction center-out reach task, as in Fig. 3D (see also, Methods). The dimensionality of  
223 the entire dataset, i.e. the number of dimensions explored by the neural manifold in Fig. 3F, was 7.1 for  
224 monkey H and 4.6 for monkey G. This number is far less than the number of recorded single units, which  
225 were 109 and 42 for monkeys H and G respectively. So a natural question is, how can we explain this order  
226 of magnitude discrepancy between the number of recorded units and the neural dimensionality, and would  
227 the dimensionality at least increase if we recorded more units? In essence, what is the origin of the simplicity  
228 implied by the low dimensionality of the neural recordings?

229 Here, our theorem (2) can provide conceptual guidance. As illustrated in Fig. 4A, our theorem in general  
230 implies that experiments in systems neurophysiology can live within 3 qualitatively distinct experimental  
231 regimes, each with its own unique predictions. First, the dimensionality  $D$  could be close to the number of  
232 recorded neurons  $M$  but far less than the NTC. This scenario suggests one may not be recording enough  
233 neurons, and that the dimensionality and accuracy of dynamic portraits may increase when recording more  
234 neurons. Second, the dimensionality may be close to the NTC but far below the number of neurons. This  
235 suggests that the task is very simple, and that the neural dynamics is very smooth. Recording more neurons  
236 would not lead to richer, higher dimensional trial averaged dynamics; the only way to obtain richer dynamics,  
237 at least as measured by dimensionality, is to move to a more complex task. Finally, and perhaps most  
238 interestingly, in the third regime, dimensionality may be far less than both the NTC and the number of  
239 recorded neurons. Then, and only then, can one say that the dimensionality of neural state space dynamics is  
240 constrained by neural circuit properties above and beyond constraints imposed by the simplicity of the task  
241 and the smoothness of the dynamics alone.

242 Returning to the motor cortical data, it is clear that scenario (i) is ruled out in this experiment. But  
243 without the definition and computation of the NTC, one cannot distinguish between scenarios (ii) and (iii).  
244 We computed the spatial and temporal autocorrelation lengths of neural activity across reach angle and time,  
245 and found them to be  $\Delta = 1.82$  radians and  $\tau = 126$  ms in monkey H, and  $\Delta = 1.91$  radians and  $\tau = 146$   
246 ms in monkey G. Given that the average reach duration is  $T = 600$  ms in both monkeys, the  $\text{NTC} = 4 \frac{T}{\tau} \frac{1}{\Delta}$   
247 is 10.5 for monkey H and 8.6 for monkey G. Comparing these NTCs to the dimensionalities  $D = 7.1$  for  
248 monkey H and  $D = 4.6$  for monkey G, and the number of recorded neurons  $M = 109$  for monkey H and  
249  $M = 42$  for monkey G (see Fig. 4B), we see that this experiment is deep within experimental regime (ii) in  
250 Fig. 4A.

251 This deduction implies several striking predictions for motor cortical dynamics. First, assuming the rest  
252 of the unrecorded neurons are statistically homogenous to the recorded neurons (implying that population  
253 smoothness  $\tau$  and  $\Delta$  would not change much as we added more neurons to our measured population),  
254 then if we were to record more neurons, even roughly all 500 million neurons in macaque motor cortex,  
255 the dimensionality of the neural manifold in each monkey would not exceed 10.5 and 8.6 respectively.



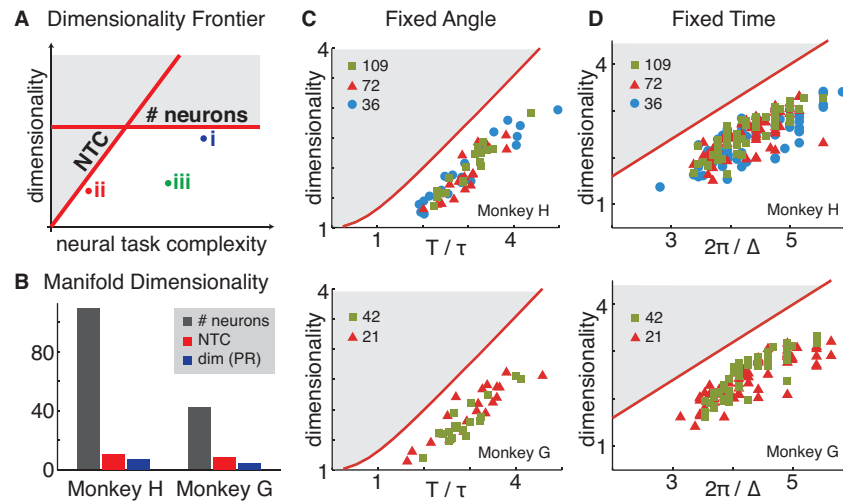

Figure 4: **A Dimensionality frontier in motor cortical data.** (A) A schematic of the dimensionality frontier imposed by theorem (2). Allowed possibilities of dimensionality  $D$  and neural task complexity,  $NTC$ , exhibit 3 distinct regimes: (i) the number of recorded neurons  $M$  but not  $NTC$  restricts dimensionality, (ii)  $NTC$  but not  $M$  restricts  $D$ , and (iii)  $D$  is far less than both  $M$  and  $NTC$ , reflecting an unexplained circuit constraint beyond smoothness and task simplicity. (B) The number of recorded neurons  $M$ , neural task complexity,  $NTC$  and dimensionality  $D$  are 109, 10.5, and 7.1 respectively for Monkey H, and 42, 8.6 and 4.6 for monkey G. (C) Dimensionality and  $NTC$  as we explore segments of neural trajectories of different durations at fixed angle, on the full neural manifold in Fig 3E. Temporal segments of different durations were chosen from a uniform distribution between 100ms and 600ms from all reach angles. For each segment we computed its dimensionality and plotted it against its own  $\frac{T}{\tau}$  ratio to obtain the scatter plot. The red curve indicates the dimensionality frontier, predicted by theory to be proportional to  $\frac{T}{\tau}$ . (D) Dimensionality and  $NTC$  as we explore along all angles on the neural manifold in 3E at fixed times. Relative to movement onset, at each 10ms interval we computed the number of dimensions explored across angles against  $\frac{2\pi}{\Delta}$  to obtain the scatter plot. Due to the natural variability in the time-dependent population tuning width, we were able to obtain  $\Delta$ 's of different values. The red curve indicates the dimensionality frontier, predicted by theory to be proportional to  $\frac{2\pi}{\Delta}$ . Moreover in both (C) and (D), we repeat the above analyses, while discarding a randomly chosen one third (red triangles) or two thirds (blue circles) of the recorded neurons for monkey H (top panels) and one half (red triangles) of the recorded neurons for monkey G (bottom panels).

256 Equivalently, if we were to drop a significant fraction of neurons from the population, the dimensionality  
 257 would remain essentially the same. In essence, dimensionality would be largely *independent* of the number  
 258 of recorded neurons. The second prediction is that if we were to vary the  $NTC$ , by varying the task, then this  
 259 would have a significant impact on dimensionality: it would be proportional to the  $NTC$ .

260 We confirm both of these predictions in Fig. 4CD. First, in the given dataset, we cannot increase the  $NTC$   
 261 further, but we can reduce it by restricting our attention to subsets of reach extents and angles. In essence we  
 262 explore restricted one-dimensional slices of the full neural manifold in Fig. 3F as follows. First, in Fig. 4B,  
 263 we explore different random time intervals at different fixed angles, and we plot the dimensionality explored  
 264 by the segment of neural trajectory against the duration  $T$  of the trajectory divided by its autocorrelation  $\tau$ .  
 265 Moreover, we vary the number of recorded neurons we keep in our analysis. Second, in Fig. 4C, we pick  
 266 different times and we plot the number of dimensions explored by the neural manifold (now a circle) across  
 267 all angles at each chosen time, against  $\frac{2\pi}{\Delta}$ , where  $\Delta$  is the smoothness parameter of the neural circle at that

268 time, again also varying the number of neurons in our analysis. As can be clearly seen, in both monkeys  
269 the predictions of the theory in experimental regime (ii) in Fig. 4A are confirmed: dimensionality is largely  
270 independent of the number of recorded neurons, and it hugs closely the dimensionality frontier set by the  
271 NTC.

272 Overall, these results suggest a conceptual revision in the way we may wish to think about neural com-  
273 plexity as measured by its dimensionality. Essentially, neural state space dynamics should not be thought  
274 of as inherently simple just because its measured dimensionality is much less than the number of recorded  
275 neurons. Instead, by properly comparing dimensionality to neural task complexity, we find neural state space  
276 dynamics in motor cortex is as complex and as high-dimensional as possible given basic task constraints and  
277 neural smoothness constraints. In essence, the neural state space dynamics represented in Fig. 3F is curving  
278 as much as possible within its speed limits set by spatiotemporal autocorrelation lengths, in order to control  
279 reaching movements.

280 We note that theorem (2) is not circular; i.e. it is not tautologically true that every possible measured  
281 neural state space dynamics, assuming enough neurons are recorded, will have dimensionality close to the  
282 NTC. In the supplementary material, we exhibit an analytical example of a very fast neural circuit, with  
283 a small temporal autocorrelation  $\tau$ , recorded for a long time  $T$ , that nevertheless has dimensionality  $D$   
284 much less than  $\frac{T}{\tau}$  because the connectivity is designed to amplify activity in a small number of dimensions  
285 and attenuate activity in all others, similar to the way non-normal networks have been proposed to play a  
286 functional role in sequence memory [Ganguli et al., 2008b]. Finally, what kind of neural dynamics would  
287 have a maximal dimensionality, equal to its NTC? As we show in the Supplementary material, a random  
288 smooth manifold, with no other structure beyond smoothness, has such maximal dimensionality.

## 289 **5 Beyond dimensionality: accurate recovery of the geometry of dynamical portraits**

290 The above theory reveals a simple sufficient condition under which the dimensionality of dynamical portraits  
291 would remain unchanged if we recorded more neurons: namely if the number of recorded neurons exceeds  
292 the NTC, and the unrecorded neurons are statistically similar to the recorded neurons so as not to change  
293 population smoothness estimates. But importantly, even if we obtain the dimensionality of neural state space  
294 dynamics correctly by simply recording more neurons than the NTC, our theory so far does not provide any  
295 guarantee that we obtain their geometry correctly. Here we address the fundamental question of how many  
296 recorded neurons are sufficient to obtain the correct dynamical portrait of circuit computation at a given level  
297 of precision? By definition, the correct dynamical portrait is what we would obtain from dimensionality  
298 reduction applied to recordings of all the neurons in the behaviorally relevant brain region in question.  
299 Importantly, how does the sufficient number of recorded neurons scale with the complexity of the task, the  
300 desired precision, the total number of neurons in the brain region, and other properties of neural dynamics?  
301 And, interestingly, what minimal aspects of neural dynamics are important to know in order to compute this  
302 number?

303 To introduce our theory, it is useful to ask, when, intuitively, would recordings from a subset of neurons  
304 yield the same dynamical portrait as recordings from all the neurons in a circuit? The simplest visualizable  
305 example is a circuit of 3 neurons, where we can only measure 2 of them (Fig. 5A). Suppose the set of neural  
306 activity patterns encountered throughout the experiment consists of a single neural trajectory, that does not  
307 curve too much, and is somewhat randomly oriented relative to the single neuron axes (or equivalently, neural  
308 activity patterns at all times are distributed across neurons). Then the act of subsampling 2 neurons out of 3  
309 is like looking at the shadow, or projection of this neural trajectory onto a coordinate subspace. Intuitively,  
310 it is clear that the geometry of the shadow will be similar to the geometry of the neural trajectory in the full  
311 circuit, no matter which 2 neurons are recorded. On the other hand, if the manifold is not randomly oriented

312 with respect to single neuron axes, so that neural activity patterns may be sparse (Fig. 5B), then the shadow  
313 of the full neural trajectory onto the subspace of recorded neurons will not preserve its geometry across all  
314 subsets of recorded neurons. The challenge of course, is to make these intuitive arguments quantitatively  
315 precise enough to guide experimental design.

316 To develop our theory of neural measurement, lets first assume the optimistic scenario in Fig. 5A, and  
317 pursue and test its consequences. If, in general, the neural data manifold (i.e. Fig. 3F) is randomly oriented  
318 w.r.t. the single neuron axes, then a measurement we can currently do, namely record from  $M$  randomly  
319 chosen neurons (Fig. 5C, top), becomes equivalent to a measurement we do not yet do, namely record from  
320  $M$  random linear combinations of all neurons in the circuit (Fig. 5C, bottom). The former corresponds to  
321 projecting the neural manifold onto a coordinate subspace as in Fig. 5A, while the latter corresponds to  
322 projecting it onto a randomly oriented  $M$  dimensional subspace. If the neural manifold is randomly oriented  
323 to begin with, the nature of the geometric distortion incurred by the shadow, relative to the full manifold, is  
324 the same in either case.

325 This perspective allows us to then invoke a well-developed theory of how smooth manifolds in a high  
326 dimensional ambient space become geometrically distorted under a random projection (RP) down to a lower  
327 dimensional subspace [Baraniuk and Wakin, 2007, Clarkson, 2008]. The measure of geometric distortion  $\epsilon$   
328 is the worst case fractional error in euclidean distances between all pairs of points on the manifold, measured  
329 in the subspace, relative to the full ambient space (see Methods). The theory states that, to achieve a desired  
330 fixed level of distortion,  $\epsilon$ , with high probability ( $> 0.95$  in our analyses below) over the choice of random  
331 projection, the number of projections  $M$  should exceed a function of the distortion  $\epsilon$ , the manifold's intrinsic  
332 dimension  $K$  (1 for trajectories, 2 for surfaces, etc.), volume  $V$ , and curvature  $C$ , and the number of  
333 ambient dimensions  $N$ . In particular the theory states that  $M \geq \frac{K}{\epsilon^2} (c_1 \log CV + c_2 \log N + c_3)$ , where  $c_1$ ,  
334  $c_2$ , and  $c_3$  are fixed constants, is sufficient. Thus intuitively, manifolds with low intrinsic dimensionality  
335 that do not curve much and have limited volume do not require that many measurements to preserve their  
336 geometry. Intriguingly, the number of ambient dimensions has a very weak effect; the number of required  
337 measurements grows only logarithmically with it. This is exceedingly fortunate, since in a neuroscience  
338 context, the number of ambient dimensions  $N$  is the total number of neurons in the relevant brain region,  
339 which could be very large. The logarithm thus ensures that this large number alone does not impose a  
340 requirement to make a prohibitively large number of measurements. Translating the rest of this formula to  
341 a neuroscience context,  $K$  is simply the number of task parameters, and  $CV$ , or curvature times volume, is  
342 qualitatively related to the NTC in (1); the numerator is the volume of the manifold in task space, and the  
343 reciprocal of correlation length is like curvature (short correlation length implies high curvature). Making  
344 this qualitative translation, the theory of neural measurement as a random projection suggests that as long as  
345 the number of recorded neurons obeys

$$M = \frac{K}{\epsilon^2} (c_1 \log \text{NTC} + c_2 \log N + c_3), \quad (3)$$

346 then we can obtain dynamical portraits with fractional error  $\epsilon$ , with high probability over the choice of a  
347 random subset of recorded neurons. Remarkably, this predicts the number of recorded neurons need only  
348 scale logarithmically with the NTC to maintain a fixed precision.

349 Thus this theory makes a striking prediction that we can test in neural data: for a fixed number of task  
350 parameters  $K$ , and a fixed number of total neurons  $N$ , if we vary the number of recorded neurons  $M$  and the  
351 NTC, and compute the worst case fractional error  $\epsilon$  in the recovered dynamical portraits relative to what we  
352 would get if we recorded all  $N$  neurons, then the iso-contours of constant distortion will be straight lines in  
353 a plane formed by  $M$  and the *logarithm* of the NTC. Of course we cannot currently record all  $N$  neurons in  
354 motor cortex, so we simply treat the dynamical portraits obtained in each monkey from all recorded neurons

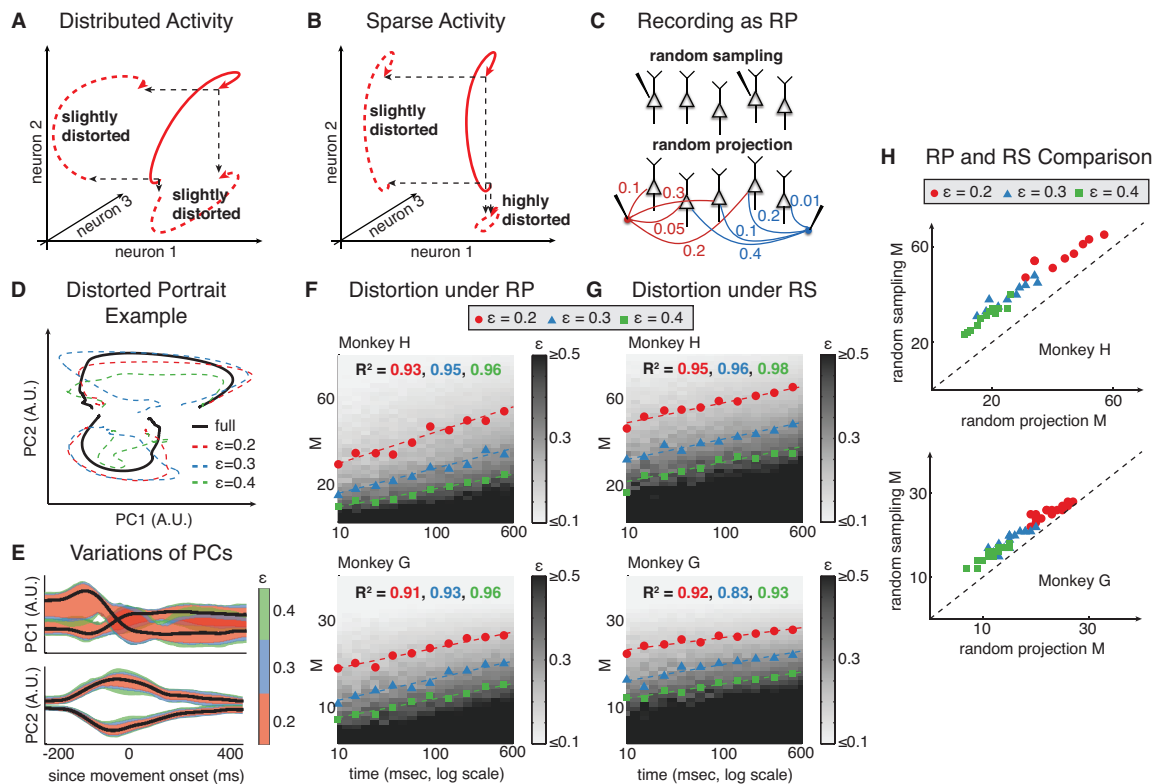

**Figure 5: Conditions for accurate recovery of the geometry of dynamical portraits**. **A**. A simple example of a  $K = 1$  dimensional neural trajectory in  $N = 3$  ambient dimensions, that is not aligned with respect to single neuron axes, so that neural patterns at all times are distributed across neurons. Recording any subset of  $M = 2$  neurons induces only small geometric distortions in the neural trajectory relative to recording all  $N = 3$  neurons. **B**. A simple example of a neural trajectory that is largely aligned with respect to the axis of neuron 2. Measuring any subset of neurons that does not include neuron 2 incurs a large distortion in the trajectory. **C**. For neural manifolds that are randomly oriented with respect to the single neuron axes, recording a random sample (RS) of  $M$  neurons (top) yields similar dynamical portraits as those obtained from recording a set of  $M$  random linear combinations, or random projection (RP), of all  $N$  neurons in the circuit. **D**. Example neural trajectories from two reach angles under different levels of distortion. The trajectories are projected into the top 2 PCs, and only rotated for optimal alignment against fully observed trajectories. **E**. Variations (95% interval) of recovered PCs under different levels of distortion. **F**. For each monkey, the 95th percentile of the distortion distribution obtained after measuring  $M$  random linear combinations of all  $N$  recorded neurons ( $N = 109$  for monkey H and  $N = 42$  for monkey G), for random neural trajectory intervals of varying duration  $T$ . For each  $M$  and  $T$  we conducted 200 random trials and in 95% of trials the distortion  $\epsilon$  between the resulting dynamical portrait and that obtained from all  $N$  recorded neurons for the same neural trajectory was less than the reported distortion. The iso-contours of constant distortion are indeed straight lines in the  $M$ - $\log T$  plane, as predicted by Eq. (3). For the iso-contours  $\epsilon = 0.2, 0.3$ , and  $0.4$ , linear regression of  $M$  against  $\log T$  yields excellent fits ( $R^2$ 's of 0.93, 0.95 and 0.96 respectively for monkey H; 0.91, 0.93 and 0.96 for monkey G). **G**. Exactly the same analysis as **F** except now the measurement process corresponds to random samples of  $M$  neurons as opposed to  $M$  random projections of all  $N$  neurons. **H**. A quantitative comparison of panels **F** and **G** through a scatter plot of the number of randomly sampled neurons versus random projections required to obtain the same distortion on neural trajectories of varying duration.

355 as the ground truth: i.e. we take  $N = 109$  in monkey H and  $N = 42$  in monkey G, as the total number  
356 of neurons, and we subsample a smaller number of neurons  $M$  from this pool. Also, we focus on the case  
357  $K = 1$ , as the neural manifold in Fig. 3F is sampled smoothly only in time, and not angle; the reaches  
358 were done at only 8 discrete angles. Therefore we vary the NTC exactly as in Fig. 4C, by choosing random  
359 intervals of neural trajectories of varying durations  $T$  at each angle. For each interval duration  $T$ , which  
360 in this restricted context we can think of as simply proportional to the NTC, we use data from a random  
361 subset of  $M$  neurons, and compute the distortion  $\epsilon(M, T)$  in the resulting dynamical portraits relative to the  
362 assumed ground-truth portrait obtained from all  $N$  recorded neurons. The theory above in Eq. (3) predicts  
363 exactly the same scaling in this scenario, with NTC replaced by time  $T$ .

364 Examples of the effects of different distortions  $\epsilon$ , obtained by by sampling different sets of  $M$  neurons,  
365 are shown in Fig. 5D for dynamic portraits and Fig. 5E for individual PC's. More generally, for each  $M$  and  
366  $T$ , we conducted 200 trials and we plotted the 95<sup>th</sup> percentile of resultant distribution of distortion  $\epsilon$  as a  
367 heat map in Fig. 5FG. (i.e. 95% of trials had distortion less than what is reported). In panel F, we measured  
368  $M$  random projections, or  $M$  random linear combinations of all  $N$  recorded neurons, for varying intervals of  
369 duration  $T$ , as the subsampled dataset, corresponding to the hypothetical experiment in Fig. 5C, bottom. It is  
370 clear that the iso-contours of constant distortion  $\epsilon$  are well fit by straight lines in a plane formed by  $M$  and the  
371 logarithm of time  $T$ . This is a completely expected result, as this analysis is simply a numerical verification  
372 of an already proven theory. However, it forms a quantitative baseline for comparison in panel G, where we  
373 repeat the same analysis in panel F, except we record random subsamples of  $M$  neurons, as in experiment  
374 5C, top. We obtain a qualitatively similar result as in panel F, which is remarkable, since this analysis is  
375 no longer a simple numerical verification of a mathematical theory. Rather, it is a stringent test of the very  
376 assumption that the neural manifold in Fig. 3F is randomly oriented enough with respect to single neuron  
377 axes so that random projections form a good theoretical model for the traditional measurement process of  
378 randomly sampling a subset of neurons. In essence it is a test of the assumption that the neural manifold is  
379 more like Fig. 5A than Fig. 5B, so that the two experiments in Fig. 5C yield similar geometric distortions  
380 in dynamical portraits as a function of recorded neurons  $M$  and neural task complexity NTC. In particular,  
381 the striking scaling of recorded neurons  $M$  with the logarithm of the NTC to maintain fixed precision in  
382 recovered dynamical portraits, predicted by the random projection theory of neural measurement, is verified.  
383 Moreover, we quantitatively compare the discrepancy between the two measurement scenarios in Fig. 5H,  
384 by creating a scatter plot of how many randomly sampled neurons versus random projections it takes to  
385 get the same distortion  $\epsilon$  across all possible neural trajectory durations  $T$ , or equivalently, NTC's. Even  
386 at a quantitative level, the data points are close to the unity line, relative to the total number of recorded  
387 neurons, suggesting that for this dataset, random projection theory is an impressively good model for the  
388 neural measurement process.

389 In the Supplementary Material, we study how these results are modified as neural activity patterns be-  
390 come more sparse and aligned with single neuron axes (i.e. less extreme versions of Fig. 5B). Remarkably,  
391 the linear scaling of number of neurons with the logarithm of NTC at fixed error is preserved, albeit with  
392 a higher slope and intercept. By comparing the neural data to simulated data with different levels of spar-  
393 sity, we find that the neural data is indeed close to randomly aligned with respect to single neuron axes, as  
394 suggested by the closeness of the points in 5H to the unity line.

## 395 **6 Discussion**

### 396 **6.1 An intuitive summary of our theory**

397 Overall, we have generated a quantitative theory of trial averaged neural dimensionality, dynamics, and  
398 measurement that can impact both the interpretation of past experiments, and the design of future ones. Our  
399 theory provides both quantitative and conceptual insights into the underlying nature of two major order of  
400 magnitude discrepancies dominating almost all experiments in systems neuroscience: (1) the dimensionality  
401 of neural state space dynamics is often orders of magnitude smaller than the number of recorded neurons  
402 (e.g. Fig. 2), and (2) the number of recorded neurons is orders of magnitude smaller than the total num-  
403 ber of relevant neurons in a circuit, yet we nevertheless claim to make scientific conclusions from such  
404 infinitesimally small numbers of recorded neurons. This latter discrepancy is indeed troubling, as it calls  
405 into question whether or not systems neuroscience has been a success or a failure, even within the relatively  
406 circumscribed goal of correctly recovering trial-averaged neural state space dynamics in such an undersam-  
407 pled measurement regime. To address this fundamental ambiguity, our theory identifies and weaves together  
408 diverse aspects of experimental design and neural dynamics, including the number of recorded neurons, the  
409 total number of neurons in a relevant circuit, the number of task parameters, the volume of the manifold of  
410 task parameters, and the smoothness of neural dynamics, into quantitative scaling laws determining bounds  
411 on the dimensionality and accuracy of neural state space dynamics recovered from large scale recordings.

412 In particular, we address both order of magnitude discrepancies by taking a geometric viewpoint in  
413 which trial-averaged neural data is fundamentally an embedding of a task manifold into neural firing rate  
414 space (Fig 3EF), yielding a neural state space dynamical portrait of circuit computation during the task. We  
415 explain the first order of magnitude discrepancy by carefully considering how the complexity of the task,  
416 as measured by the volume of the task manifold, and the smoothness of neural dynamics, as measured by  
417 a product of neural population correlation lengths across each task parameter, can conspire to constrain the  
418 maximal number of linear dimensions the neural state space dynamics can possibly explore. We define a  
419 mathematical measure, which we call neural task complexity (NTC), which, up to a constant, is simply the  
420 ratio of the volume of the task manifold and the product of neural population correlation lengths (Eq. (1))  
421 and we prove (see Supplementary material) that this measure forms an upper bound on the dimensionality  
422 of neural state space dynamics (Eq. (2)). We further show in neural data from the motor cortex of reaching  
423 monkeys, that the NTC is much smaller than the number of recorded neurons, while the dimensionality  
424 is only slightly smaller than the NTC (Fig. 4). Thus the simplicity of the center out reach task and the  
425 smoothness of motor cortical activity, are by themselves sufficient to explain the low dimensionality of the  
426 dynamics relative to the number of recorded neurons. A natural hypothesis is that for a wide variety of tasks,  
427 neural dimensionality is much smaller than the number of recorded neurons because the task is simple and  
428 the neural population dynamics is smooth, leading to a small NTC. In such scenarios (experimental regime  
429 (ii) in Fig. 4A), only by moving to more complex tasks, not by recording more neurons, would we obtain  
430 richer higher dimensional trial averaged state space dynamics.

431 We address the second, more troubling, order of magnitude discrepancy by making a novel conceptual  
432 link between the time-honored electrophysiology tradition of recording infinitesimally small subsets of neu-  
433 rons in much larger circuits, and the theory of random projections, corresponding in this context to recording  
434 small numbers of random linear combinations of *all* neurons in the circuit. In scenarios where the neural  
435 state space dynamics is sufficiently randomly oriented with respect to single neuron axes (e.g. Fig. 5A) these  
436 two different measurement scenarios (Fig. 5C) yield similar predictions for the accuracy with which the dy-  
437 namics are recovered as a function of the number of recorded neurons, the total number of neurons in the  
438 circuit, the volume of the task manifold, and the smoothness of the neural dynamics. A major consequence

439 of the random projection theory of neural measurement is that the worst case fractional error in the geometry  
440 of recovered neural state space dynamics increases only with the *logarithm* of the total number of neurons in  
441 the circuit (Eq. (3)). This remarkable property of random projections goes hand in hand with why systems  
442 neuroscience need not be daunted by so many unrecorded neurons: we are protected from their potentially  
443 detrimental effect on the error of state space dynamics recovery by a strongly compressive logarithm. More-  
444 over, the error grows linearly with the number of task parameters, and only again *logarithmically* with the  
445 NTC, while it decreases linearly in the number of recorded neurons (Eq. (3)). Thus recording a modest  
446 number of neurons can protect us against errors due to the complexity of the task, and lack of smoothness in  
447 neural dynamics.

448 This theory then resolves the ambiguity of whether systems neuroscience has achieved success or has  
449 failed in correctly recovering neural state space dynamics. Indeed it may well be the case that in a wide  
450 variety of experiments, we have indeed been successful, as we have been doing simple tasks with a small  
451 number of task parameters and NTC, and recorded in circuits with distributed patterns of activity, making  
452 random projections relevant as a model of the measurement process. Under these conditions, we have  
453 shown there is a modest requirement on the number of recorded neurons to achieve success. Our work  
454 thereby places many previous works on dimensionality reduction in neuroscience on much firmer theoretical  
455 foundations. Having summarized our theory, below we discuss its implications and its relations to other  
456 aspects of neuroscience.

## 457 **6.2 Dimensionality is to neural task complexity as information is to entropy**

458 To better understand the NTC, and its relation to dimensionality, it is useful to consider an analogy between  
459 our results and applications of information theory in neuroscience [Reike et al., 1996]. Indeed, mutual in-  
460 formation has often been used to characterize the fidelity with which sensory circuits represent the external  
461 world. However, suppose that one reported that the mutual information rate  $I(\mathcal{S}, \mathcal{R})$  between the sensory  
462 signal  $\mathcal{S}$  and the neural response  $\mathcal{R}$  were 90 bits per second, as it is in the fly H1 neuron [Strong et al., 1998].  
463 This number by itself would be difficult to interpret. However, just as dimensionality is upper bounded by the  
464 neural task complexity, mutual information  $I$  is upper bounded by entropy  $H$ , i.e.  $I(\mathcal{S}, \mathcal{R}) \leq H(\mathcal{R})$ . Thus  
465 if one measured the entropy rate of the response spike train to be 180 bits per second [Strong et al., 1998],  
466 then by comparing the mutual information to the entropy one could make a remarkable conclusion, namely  
467 that the neural code is highly efficient: the fidelity with which the response  $\mathcal{R}$  codes for the stimulus  $\mathcal{S}$  is  
468 within a factor of 2 of the fundamental limit set by the entropy of the neural response  $\mathcal{R}$ .

469 Similarly, the observation that the dimensionality of recordings of 109 neurons in Monkey H in Fig. 4  
470 is 7.1, is by itself, difficult to interpret. However, if one computed the NTC to be 10.5, then by comparing  
471 dimensionality to the NTC, one could make another remarkable conclusion, namely that motor cortex is  
472 exploring almost as many dimensions as possible given the limited extent, or volume of behavioral states  
473 allowed by the task, and the limited speeds with which neural population dynamics can co-vary across  
474 behavioral states. Thus just as entropy, as an upper bound on mutual information, allows us to measure  
475 the fidelity of the neural code on an absolute scale from 0 to 1 through the ratio of information to entropy,  
476 the NTC, as an upper bound on dimensionality, allows us to measure the complexity of neural state space  
477 dynamics on an absolute scale from 0 to 1, through the ratio of dimensionality to NTC. When this ratio is 1,  
478 neural dynamics is as complex, or high dimensional, as possible, given task and smoothness constraints.

### 479 6.3 Towards a predictive theory of experimental design

480 It may seem that neural task complexity could not be useful for guiding the design of future experiments,  
481 as its very computation requires knowing the smoothness of neural data, which would not have yet been  
482 collected. However, this smoothness can be easily estimated based on knowledge of previous experiments.  
483 As an illustration, consider how one might obtain an estimate of how many neurons one would need to  
484 record in order to accurately recover neural state space dynamics during a more complex reaching task in  
485 3 dimensions. For concreteness, suppose a monkey has to reach to all points on a sphere of fixed radius  
486 centered at the shoulder of the reaching arm. The manifold of trial averaged task parameters is specified  
487 by time  $t$  into the reach, which varies from 0 to  $T$  ms, and the azimuthal and altitudinal angles  $\phi$  and  $\theta$ ,  
488 each of which range from 0 to  $2\pi$ . Now lets assume the smoothness of neural population dynamics across  
489 time will be close to the average of what we observed for 2 dimensional reaches ( $\tau = 126$  and  $146$  ms  
490 in monkeys H and G). Also lets assume reaches will take on average  $T = 600$  ms as it did in the case of  
491 two dimensional reaches. Then the we obtain the estimate  $\frac{T}{\tau} = \frac{600}{136} = 4.41$ . Now again, lets assume that  
492 both azimuthal ( $\Delta_\phi$ ) and altitudinal ( $\Delta_\theta$ ) neural correlation lengths would be the average of the angular  
493 correlation length of two dimensional reaches ( $\Delta = 1.82$  and  $1.91$  radians in monkeys H and G), yielding  
494  $\frac{2\pi}{\Delta_\phi} = \frac{2\pi}{\Delta_\theta} = \frac{2\pi}{1.865} = 3.37$ . Then the NTC, according to Eq. (1), is proportional to the product of these  
495 3 numbers, where in 3 dimensions, the constant of proportionality could be taken to be  $C = \left(\frac{2}{\pi}\right)^{3/2}$ . This  
496 product yields an estimate of NTC =  $\left(\frac{2}{\pi}\right)^{3/2} \times 4.41 \times 3.37 \times 3.37 = 25.4$ .

497 If we trust this estimate, then this simple computation, coupled with our theorems proven above, allows  
498 us to make some predictions that can guide experimental design. For example, the theorem in Eq. (1) implies  
499 that no matter how many neurons we record in monkey motor and premotor cortices, the dimensionality of  
500 the trial averaged state space dynamics will not exceed 25. Moreover, the theorem in Eq. (3) tells us that  
501 if we wish to recover this state space dynamics to within fractional error  $\epsilon = 0.2$ , relative to what we  
502 would obtain if we recorded all task relevant neurons, then we should record at least  $M = 300$  neurons (see  
503 Supplementary Material). Now of course, we may not wish to trust this estimate, because we may have mis-  
504 estimated the neural correlation lengths. To be safer, we could easily underestimate the correlation lengths,  
505 and thereby obtain a safe overestimate of the NTC and requisite number of neurons to record. But overall, in  
506 this fashion, by combining an estimate of a likely NTC in future experiments with the new theorems in this  
507 work, we can obtain back of the envelope estimates of the dimensionality and accuracy of recovered state  
508 space dynamics, as neuroscience moves forward to unravel the neural basis for more complex behavioral  
509 and cognitive acts.

### 510 6.4 Departures from our assumption of statistical homogeneity

511 A critical assumption in using our theory to guide future experiments is that the set of unrecorded neurons  
512 is statistically similar to the set of recorded neurons, so that the denominator of the NTC in Eq. (1) will  
513 not change much as we fix the task and record more neurons. There are several important ways that this  
514 assumption could be violated. For example, there could be strong spatial topography in the neural code of  
515 the relevant circuit, so that as we expand our electrode array to record more neurons, the new neurons might  
516 have fundamentally different coding properties. Also, we may wish to record from multiple task relevant  
517 brain regions simultaneously, in which case our theory would have to apply to each brain region individually.  
518 Moreover, there may be multiple cell types in the relevant brain region. Unfortunately, most electrophysiol-  
519 ogy recordings do not give us access to cell type information (though spike width can sometimes serve as a  
520 proxy for the excitatory/inhibitory distinction). Thus the recovered neural state space dynamics reflects the  
521 combined action of all cell types. However, if we had access to cell type information, we may wish to define



522 state space dynamical variables for each cell type. Then the theory would apply to each cell type alone.  
523 However, if cells of different types are strongly coupled, it is not clear that the collective dynamics of the cir-  
524 cuit should be well explained by reduced degrees of freedom, or state, that are in one-to-one correspondence  
525 with cell types. This is an important empirical issue for further studies.

526 In essence, our theory applies to a spatially well mixed, statistically homogenous, localized brain region  
527 whose dynamics is relevant to the task. Fortunately, a wide variety of phylogenetically newer brain regions  
528 that evolved to learn new connectivities to solve tasks that evolution itself could not anticipate, for example  
529 prefrontal, parietal, pre-motor and motor cortices, and even older hippocampal circuits, exhibit precisely  
530 these kinds of mixed representations, in which the coding properties of individual neurons exhibit no dis-  
531 cernible spatial topography, and almost every neuron codes for a mixture of multiple task parameters (e.g.  
532 [Machens et al., 2010, Mante et al., 2013, Rigotti et al., 2013, Raposo et al., 2014]). These are precisely the  
533 properties that make the neural manifold randomly oriented with respect to single neuron axes, and there-  
534 fore make our random projection theory of neural measurement relevant, and the recovery of state space  
535 dynamics relatively easy despite subsampling.

536 But ironically, these very same properties make the goal of understanding what each and every individual  
537 neuron in the circuit does a seemingly difficult and questionable endeavor. While this endeavor has indeed  
538 traditionally been the putative gold standard of understanding, perhaps instilled in systems neuroscience by  
539 the tremendous success of Hubel and Wiesel in discovering single cell orientation tuning in primary visual  
540 cortex [Hubel and Wiesel, 1959], it is unclear that it will continue to be a profitable path going forward,  
541 especially in recently evolved brain regions where mixed representations dominate. But fortunately, the  
542 path of moving away from understanding single neurons to recovering collective state space dynamics, is  
543 a promising route forward, and indeed one that has firmer theoretical justification now, even in the face of  
544 extreme neural subsampling.

## 545 **6.5 A why question: the neuroscientist and the single neuron**

546 We have shown that when neural representations are distributed, or randomly enough oriented with respect to  
547 single neuron axes (Fig. 5A), so that random projections constitute a good model of the neural measurement  
548 process (Fig. 5C), then the life of the neuroscientist studying neural circuits becomes much easier: he or she  
549 can dramatically subsample neurons, yet still recover global neural state space dynamics with reasonable  
550 accuracy. However, neural systems evolved on earth long before neuroscientists arrived to study them. Thus  
551 no direct selection pressures could have possibly driven neural systems to self-organize in ways amenable  
552 to easy understanding by neuroscientists. So one could then ask a teleological question: why did neural  
553 systems organize themselves this way?

554 One possible answer lies in an analogy between the neuroscientist and the single neuron, whose goals  
555 may be inadvertently aligned. Just as a neuroscientist needs to read the state of a cortical neural circuit by  
556 sampling  $O(100)$  randomly chosen neurons, a downstream cortical neuron needs to compute a function of  
557 the state of the upstream circuit while listening to  $O(10,000)$  neurons. Intuitively, if neural activity patterns  
558 are low dimensional enough, and distributed enough across neurons, then the single neuron will be able  
559 to do this. Indeed, a few works have studied constraints on neural representations in the face of limited  
560 network connectivity. For example, [Valiant, 2005] showed that the sparser neural connectivity is, the more  
561 distributed neural representations need to be, in order for neural systems to form arbitrary associations  
562 between concepts. Also [Sussillo and Abbott, 2012] showed that if neural representations in a circuit are  
563 low dimensional and randomly oriented with respect to single neuron axes, then a neuron that subsamples  
564 that circuit can compute any function of the circuit's state that is computable by a neuron that can listen  
565 to all neurons in the circuit. And finally, [Kim et al., 2012] showed that the hippocampal system appears

566 to perform a random projection, transforming a sparse CA1 representation of space into a dense subicular  
567 representation of space, yielding the ability to communicate the output of hippocampal computations to the  
568 rest of the brain using very few efferent axons.

569 These considerations point to an answer to our teleological question: in essence, our success as neuro-  
570 scientists, in the accurate recovery of neural state space dynamics under extreme subsampling, may be an  
571 exceedingly fortunate corollary of evolutionary pressures for single neurons to communicate and compute  
572 accurately under the constraints of limited degree network connectivity.

## 573 **6.6 Beyond the trial average: towards a theory of single trials**

574 A natural question is how this theory would extend to the situation of single trial analyses. Several new  
575 phenomena can arise in this situation. First, in any single trial, there will be trial to trial variability, so that  
576 neural activity patterns may lie near, but not on, the trial averaged neural manifold, illustrated for example  
577 in Fig. 3F. The strength of this trial to trial variability can be characterized by a single neuron SNR, and it  
578 can impact the performance of various single trial analyses. Second, on each and every trial, there may be  
579 fluctuations in internal states of the brain, reflecting potentially cognitive variables like attention, or other  
580 cognitive phenomena, that are uncontrolled by the task. Such fluctuations would average out in the trial  
581 averaged manifold, but across individual trials would manifest as structured variability around the manifold.  
582 It would be essential to theoretically understand methods to extract these latent cognitive variables from the  
583 statistics of structured variability. Third, the trial averaged neural manifold may have such a large volume,  
584 especially in a complex task, so that in a finite number of trials  $P$  we may not be able to sufficiently cover this  
585 volume. One would like to know then, what is the minimum number of training trials  $P$  one would require,  
586 to successfully decode behavioral or cognitive variables on subsequent, held-out, single trials. Moreover,  
587 how would this minimum number of trials scale with properties of the trial averaged manifold, obtained  
588 only in the limit of very large numbers of trials?

589 We have already begun to undertake a study of these and other questions. Our preliminary results, some  
590 of which were stated in [Gao and Ganguli, 2015], suggest that the basic theory of trial averaged neural data  
591 analysis forms an essential springboard for addressing theories of single-trial data analysis. For example, in  
592 the case of the last question above, we find that the number of training trials  $P$  must scale with the NTC  
593 of the trial averaged neural manifold, in order for subsequent single trial decoding to be successful. Moreover,  
594 we have analyzed theoretically the recovery of internal states reflected in the spontaneous activity of large  
595 model neural circuits, while subsampling only  $M$  neurons for a finite amount of time  $\frac{T}{\tau}$  (a dimensionless  
596 ratio of recording time to single neuron correlation time  $\tau$ ). We find that the dynamics of these internal  
597 states can be accurately recovered as long as (a) both  $M$  and  $\frac{T}{\tau}$  exceed the intrinsic dimensionality explored  
598 by the manifold of latent circuit states, and (b) the square-root of the product of neurons  $M$  and  $\frac{T}{\tau}$  exceeds  
599 a threshold set by both this dimensionality and the single neuron SNR [Gao and Ganguli, 2015]. In turn  
600 the dimensionality of the manifold of latent circuit states is upper bounded by its NTC, so the NTC of a  
601 latent neural manifold determines the viability of single trial analyses, just as it does in the recovery of  
602 neural manifolds explicitly associated with externally measured task parameters. And finally, one may be  
603 tempted to conjecture that, due to finite SNR, single trial decoding performance may grow without bound  
604 as the number of recorded neurons increase - a result that is qualitatively different from the trial averaged  
605 theory, which suggests that only modest only numbers of neurons are required to accurately recover neural  
606 state space dynamics. However, there are several reasons to believe that such a qualitative discrepancy may  
607 not bear out. For example, neural noise may be embedded in the same direction as the signal, resulting in  
608 information limiting correlations [Moreno-Bote et al., 2014]. Moreover, empirically, in single trial decoding  
609 in the brain machine interface community, decoding performance already achieves a point of diminishing

610 returns at even modest numbers of recorded neurons. The precise theoretical reasons for this remain an  
611 object of future study.

612 But overall, our initial results in a theory of single-trial analyses, to be presented elsewhere, suggest  
613 that the theory of trial-averaged neural dimensionality, dynamics and measurement, presented here, not only  
614 provides interpretive power for past experiments, and guides the design of future trial averaged experiments,  
615 but also provides a fundamental theoretical building block for expansion of the theory to single trial anal-  
616 yses. In essence, this work provides the beginnings of a theoretical framework for thinking about how and  
617 when statistical analyses applied to a subset of recorded neurons correctly reflect the dynamics of a much  
618 larger, unobserved neural circuit, an absolutely fundamental question in modern systems neuroscience. A  
619 proper, rigorous theoretical understanding of this question will be essential as neuroscience moves forward  
620 to elucidate the neural circuit basis for even more complex behavioral and cognitive acts, using even larger  
621 scale neural recordings.

## 622 **7 Materials and Methods**

### 623 **7.1 Dimensionality Measure**

624 Our measure of dimensionality is derived from the eigen-spectrum of the neuronal covariance matrix. This  
625 matrix underlies PCA, and indicates how pairs of neurons covary across time and task parameters (see  
626 Supplementary material). The eigenvalues of this matrix,  $\mu_1 \geq \mu_2 \geq \dots \geq \mu_M$ , reflect neural population  
627 variance in each eigen-direction in firing rate space. The participation ratio (PR),

$$\text{PR} = \frac{(\sum_i \mu_i)^2}{\sum_i \mu_i^2}, \quad (4)$$

628 is a natural continuous measure of dimensionality. Intuitively, if all variance is concentrated in one dimen-  
629 sion, so that  $\mu_\alpha = 0$  for  $\alpha \geq 2$ , then  $\text{PR}=1$ . Alternatively, if the variance is evenly spread across all  $M$   
630 dimensions, so that  $\mu_1 = \mu_2 = \dots = \mu_M$ , then  $\text{PR}= M$ . For other PCA eigenspectra, the PR sensibly interpo-  
631 lates between these two regimes, and for a wide variety of uneven spectra, the PR corresponds to the number  
632 of dimensions required to explain about 80% of the total population variance (see Supplementary material).

### 633 **7.2 Preprocessing of the Motor Cortical Dataset**

634 We use multi-electrode array recordings from two monkeys' (H and G) PMd and M1 areas as they performed  
635 an eight-direction center-out delayed reach task [Yu et al., 2007]. There are between 145 and 148 trials in  
636 monkey H's dataset and between 219 and 222 trials in monkey G's dataset for each of the eight reach direc-  
637 tions. Neural activities from each trial are time aligned to hand movement onset (time of 15% maximal hand  
638 velocity), and restricted to the -250ms to 350ms range time window around movement onset. Each spike  
639 train is smoothed with a 20ms gaussian kernel, and averaged with trials of the same reach angle to obtain the  
640 averaged population firing rates for the eight conditions. To homogenize the activity levels between neurons  
641 of different firing rates, and to highlight variability in the data resulting from task conditions, we further  
642 applied the square-root transform to population firing rates [Thacker and Bromiley, 2001], and subtracted  
643 their cross-condition average [Churchland et al., 2012].

### 644 7.3 Distortion Measure

645 To quantify the geometric distortion of dynamic portraits incurred from projecting them down from the  $N$   
646 dimensional space of all neurons to the  $M$  dimensional subspace of recorded neurons (or  $M$  dimensional  
647 random subspace for a random projection), we adopt the pairwise distance distortion measure widely em-  
648 ployed in the theory of random projections. Let  $\mathbf{P}$  be the  $M$ -by- $N$  linear projection operator that maps  
649 points from the full  $N$ -dimensional neural space into the  $M$ -dimensional subspace. For any pair of neural  
650 activity patterns  $\mathbf{x}^i$  and  $\mathbf{x}^j$  in the full  $N$ -dimensional space, the pairwise distance distortion induced by  $\mathbf{P}$  is  
651 defined as

$$d_{ij}(\mathbf{P}) = \sqrt{\frac{N}{M} \frac{\|\mathbf{P}\mathbf{x}^i - \mathbf{P}\mathbf{x}^j\|}{\|\mathbf{x}^i - \mathbf{x}^j\|}} - 1, \quad (5)$$

652 where the  $\sqrt{N/M}$  ratio compensates for the global distortion introduced simply by the reduction in dimen-  
653 sionality, and  $\|\mathbf{v}\|$  denotes the Euclidean length of a vector  $\mathbf{v}$ . A distortion of 0 indicates that the pairwise  
654 distance is the same both before and after the projection (up to an overall scale). The worst case distortion  
655 over all pairs of points  $(i, j)$  on the neural manifold is given by,

$$d^{\max}(\mathbf{P}) = \max_{i,j} d_{ij}(\mathbf{P}). \quad (6)$$

656 Since under either random projection or random sampling,  $\mathbf{P}$  is a random mapping,  $d^{\max}(\mathbf{P})$  is a random  
657 variable. We characterize the distortion by the 95th percentile of the distribution of this random variable, i.e.  
658 that  $\epsilon$  for which

$$\text{Prob}(d^{\max}(\mathbf{P}) \leq \epsilon) = 0.95.$$

659 Thus with high probability (95%), over the random set of  $M$  measurements, the worst case distortion over  
660 all pairs of points on the neural manifold, will not exceed  $\epsilon$ . In Fig. 5, for each value of  $M$  and  $T$ , we  
661 estimated  $\epsilon$  by computing  $d^{\max}(\mathbf{P})$  200 times for different random choices of  $\mathbf{P}$ , and set  $\epsilon$  to be the 95th  
662 percentile of this empirical distribution of distortions.

## 663 8 Acknowledgements

664 We thank S. Lahiri for inputs on dimensionality upper bound proofs. This work was supported by the  
665 Stanford Graduate Fellowship (P.G. and E.T.), the Mind, Brain and Computation Trainee Program (NSF  
666 IGERT 0801700, P.G. and E.T.), the Ruth L. Kirschstein National Research Service Award Predoctoral  
667 Fellowship (E.T.), NIH Director's Pioneer Award (8DPIHD075623) and the Burroughs Wellcome, Simons,  
668 McKnight, and James S. McDonnell foundations.

# 669 **Supplementary Materials:** 670 **A Theory of Multi-Neuronal Dimensionality,** 671 **Dynamics and Measurement**

|     |                                                                                                                          |           |
|-----|--------------------------------------------------------------------------------------------------------------------------|-----------|
| 672 | <b>I Introduction</b>                                                                                                    | <b>21</b> |
| 673 | <b>II The relation between neuronal and task dimensionality</b>                                                          | <b>22</b> |
| 674 | II.I Review of principal components analysis as a dimensionality reduction method . . . . .                              | 22        |
| 675 | II.II Participation ratio as a measure of dimensionality . . . . .                                                       | 24        |
| 676 | II.III A duality between neuronal dimension and task dimension . . . . .                                                 | 24        |
| 677 | II.IV Dimensionality of simple stationary tasks unfolding over time . . . . .                                            | 25        |
| 678 | II.V Example stationary tasks: relation between participation ratio and fraction of variance explained . . . . .         | 27        |
| 680 | <b>III Towards Neural Task Complexity: upper bounds on dimensionality through destruction of structure</b>               | <b>29</b> |
| 681 | III.I Increasing dimensionality by reducing long-range correlation . . . . .                                             | 29        |
| 682 | III.II Increasing dimensionality by homogenizing dynamics . . . . .                                                      | 30        |
| 683 | III.III The best stationary approximation to a task has higher dimensionality than the original task . . . . .           | 30        |
| 684 | III.IV For multiple task parameters, a factorized stationary approximation to a task has higher dimensionality . . . . . | 32        |
| 685 | III.IV For multiple task parameters, a factorized stationary approximation to a task has higher dimensionality . . . . . | 32        |
| 686 | III.IV For multiple task parameters, a factorized stationary approximation to a task has higher dimensionality . . . . . | 32        |
| 687 | III.V Algorithmic computation of neural task complexity . . . . .                                                        | 34        |
| 688 | <b>IV Examples of the relationship between dimensionality and neural task complexity</b>                                 | <b>35</b> |
| 689 | IV.I Dimensionality and neural task complexity for discrete stimuli or behavioral conditions . . . . .                   | 35        |
| 690 | IV.II Random smooth manifolds have dimensionality equal to neural task complexity . . . . .                              | 36        |
| 691 | IV.III Intrinsic constraints on neural dynamics can prevent dimensionality from approaching the NTC . . . . .            | 38        |
| 692 | IV.III Intrinsic constraints on neural dynamics can prevent dimensionality from approaching the NTC . . . . .            | 38        |
| 693 | <b>V Neural task complexity and random projections as a theory of neural measurement</b>                                 | <b>39</b> |
| 694 | V.I Review of random projection theory . . . . .                                                                         | 39        |
| 695 | V.II Numerical analysis of scaling behavior a random projection theory of measurement . . . . .                          | 41        |
| 696 | V.III Scaling of distortion with neural sparsity . . . . .                                                               | 43        |

## 697 **I Introduction**

698 In this supplementary material, we fill in the technical details associated with the main manuscript, and  
699 present proofs of the theorems stated there. The outline of the supplementary material is as follows.

700 In Sec. II, after reviewing principal components analysis, we justify the participation ratio as a reason-  
701 able measure of neural dimensionality, and explain its relation to more traditional measures like fraction of  
702 variance explained as a function of the number of principal components retained. We also explain rigorously  
703 how neural dimensionality is intimately related to task dimensionality through simple properties of linear  
704 algebra. Finally we compute the dimensionality of simple stationary tasks.

705 In Sec. III we introduce the logic behind neural task complexity (NTC) and why it places an upper bound  
706 on neural dimensionality. Along the way we prove a series of rigorous theorems in which we successively  
707 destroy structure in neural data, and show that the resultant destroyed dataset has higher dimensionality  
708 than the original dataset. The final outcome of this destruction of structure yields a simple dataset that is  
709 characterized purely by the number and range of task parameters and the local smoothness of the original  
710 dataset along each task parameter. The dimensionality of this simple dataset is by definition the NTC, and by  
711 construction it forms an upper bound on the dimensionality of the original dataset. Along the way we prove  
712 several intermediate results: (1) destroying long range correlations in a dataset increases its dimensionality;  
713 (2) making a dataset more homogeneous increases its dimensionality; (3) the best stationary approximation  
714 to a dataset has higher dimensionality than the original one; and (4) a particular factorization of a dataset  
715 across multiple task parameters has higher dimensionality than the original. Overall, this section proves the  
716 central results of Equations (1) and (2) in the main paper.

717 In Sec. IV we provide examples of the relationship between measured dimensionality, number of  
718 recorded neurons, and neural task complexity for a diverse set of theoretical models for datasets. We begin  
719 with a set of discrete stimuli, which we do not consider in the main paper, but include here for completeness.  
720 We then consider the case of random smooth neural manifolds, as an example of a model dataset in which  
721 actual dimensionality equals the neural task complexity. For both of these datasets, we show that the mea-  
722 sured dimensionality initially grows with the number of recorded neurons, but then saturates to the value of  
723 the actual dimensionality as soon as the number of recorded neurons exceeds the actual dimensionality by  
724 a factor of about 10. This is consistent with the theory of random projections discussed later in which the  
725 preservation of geometric structure in data (including its dimensionality) to within a fractional error, requires  
726 a number of neurons that varies inversely with the error tolerance. Finally, at the end of Sec. IV we provide  
727 a theoretical neural network model that generates a dataset that lies deep within the elusive experimental  
728 regime (iii) in Figure 4A of the main paper. In this regime, the actual dimensionality is much less than the  
729 NTC (as well as the number of measured neurons), indicating that some neural network property is constrain-  
730 ing dimensionality to a smaller value than that predicted by limited recording time and neural smoothness  
731 alone. In our example, this property is non-normal amplification which rapidly constraints network activity  
732 to a small number of neural activity patterns.

733 In Sec. V we begin with a self-contained review of seminal results in random projection theory. We  
734 then explore random projections of smooth manifolds in detail using simulations to quantitatively determine  
735 different constants of proportionality relating the number of required projections to the volume, smoothness,  
736 and ambient dimension of the manifold. These numerical simulations demonstrate that the constants of  
737 proportionality, which were not measured quantitatively in prior work, are not that large and are indeed  
738  $O(1)$ . Finally, we explore the effects of sparsity on neural activity, confirming that the essential theoretical  
739 prediction verified in Fig. 5 in the main paper, namely that the number of recorded neurons  $M$  need only  
740 scale logarithmically with the NTC in order to achieve a constant level of distortion, holds even when the  
741 data is quite sparse.

## 742 **II The relation between neuronal and task dimensionality**

### 743 **II.I Review of principal components analysis as a dimensionality reduction method**

744 Trial averaged neural data is often described by an  $M$ -by- $N_T$  data matrix,  $\mathbf{X}$ . The  $M$  rows of  $\mathbf{X}$  correspond  
745 to  $M$  recorded neurons, while the  $N_T$  columns of  $\mathbf{X}$  correspond to all experimental task conditions - i.e. the  
746 columns could range over all combinations of time points and task parameter values occurring throughout  
747 the experiment. Each matrix element  $\mathbf{X}_{i\alpha}$  reflects the firing rate of neuron  $i$  in task condition  $\alpha$ . For example,

748 for a simple task unfolding over time as shown in Fig. 1 of the main paper, each column of  $\mathbf{X}$  represents a  
 749 pattern of firing rates across  $M$  recorded neurons at some specified time, and  $N_T$  is equal to the total number  
 750 of sampled time points.

751 Principal components analysis (PCA), as a method of dimensionality reduction, starts from the  $M$  by  $M$   
 752 neuronal covariance matrix,

$$\mathbf{C}^{\text{Neuron}} = \frac{1}{N_T} \mathbf{X} \mathbf{X}^T. \quad (7)$$

753 Here we have assumed that the data matrix  $\mathbf{X}$  is centered, so that the sum of the columns is 0 (i.e.  $\sum_{a=1}^{N_T} \mathbf{X}_{ia} =$   
 754  $0 \forall i$ ). Geometrically, this means the cloud of  $N_T$  neural activity patterns in  $M$  dimensional firing rate space,  
 755 where each point in the cloud corresponds to a column of  $\mathbf{X}$ , has its center of mass at the origin. Each matrix  
 756 element  $\mathbf{C}_{ij}^{\text{Neuron}}$  then reflects how strongly the firing rates of neurons  $i$  and  $j$  co-vary across task parameters.

757 PCA relies on the eigen-decomposition of  $\mathbf{C}^{\text{Neuron}}$ , given by

$$\mathbf{C}^{\text{Neuron}} = \sum_{\alpha=1}^M \mu_{\alpha} \mathbf{u}^{\alpha} \mathbf{u}^{\alpha T}, \quad (8)$$

758 where  $\mathbf{u}^{\alpha}$ 's are the eigenvectors of  $\mathbf{C}^{\text{Neuron}}$  and the  $\mu_{\alpha}$ 's denote the associated ordered eigenvalues, so that  
 759  $\mu^1 \geq \mu^2 \geq \dots \geq \mu^M$ . Each eigenvector  $\mathbf{u}^{\alpha}$  can be thought of as a static, spatial basis pattern of firing rates  
 760 across neurons (i.e. the red and blue patterns in Fig. 1C of the main paper). Each eigenvalue  $\mu_{\alpha}$  reflects the  
 761 amount of neural population variance along firing rate direction  $\mathbf{u}^{\alpha}$ . Also, if we project neural activity onto  
 762 pattern  $\mathbf{u}^{\alpha}$ , we obtain the amount of pattern  $\alpha$  in the neural population in task condition  $a$ :

$$c_a^{\alpha} = \sum_{i=1}^M \mathbf{u}_i^{\alpha} \mathbf{X}_{ia}. \quad (9)$$

763 The variance of  $c_a^{\alpha}$  across task conditions  $a$  is precisely (up to a normalization by  $N_T$ ) the variance of  
 764 the neural population in the direction  $\mathbf{u}^{\alpha}$ , i.e. the eigenvalue  $\mu_{\alpha}$ . In the special case, where  $a$  simply  
 765 indexes time, we can think  $c_a^{\alpha}$  as one component of a dynamical trajectory in pattern space (i.e. the temporal  
 766 components in Fig. 1C of the main paper). A low,  $D$  dimensional dynamic portrait of the trial-averaged  
 767 data can then be obtained by plotting the top  $c_a^{\alpha}$  against each other, for  $\alpha = 1, \dots, D$  (i.e. Fig. 1D of  
 768 the main paper). The fraction of variance explained by the top  $D$  dimensions is  $r = \frac{1}{\mu_{\text{Tot}}} \sum_{\alpha=1}^D \mu_{\alpha}$ , where  
 769  $\mu_{\text{Tot}} = \sum_{\alpha=1}^M \mu_{\alpha}$  is the total variance in the neural population.

770 Dimensionality reduction by PCA is considered successful if a small number of patterns  $D$  relative to  
 771 number of recorded neurons  $M$ , accounts for a large fraction of variance explained in the neural state space  
 772 dynamics. One possible measure of dimensionality is the minimal number of basis patterns in the projection  
 773 one must keep to achieve some pre-specified fraction,  $r$ , of the neural population's total variance:

$$D(r) = \arg \min_D \text{ s.t. } \frac{\sum_{\alpha=1}^D \mu_{\alpha}}{\mu_{\text{Tot}}} \geq r. \quad (10)$$

774 Note, that like any sensible measure of dimensionality based on the neuronal covariance eigenspectrum,  
 775 this measure is invariant to an overall scaling of the eigenvalues. Fig. 2 of the main paper indicates that  
 776 many experiments yield exceedingly low dimensional neural state space dynamics, in that a small number of  
 777 dimensions relative to number of recorded neurons account for a large fraction of explained variance. Indeed,  
 778 in many experiments, there is an order of magnitude discrepancy between dimensionality and number of  
 779 recorded neurons, and one of our goals below is to understand the origin of such a large discrepancy, as well  
 780 as to understand the accuracy of the dynamical portraits given by  $c_a^{\alpha}$  in the face of extreme subsampling in  
 781 the number of recorded neurons.

## 782 II.II Participation ratio as a measure of dimensionality

783 While commonly used, measures of dimensionality associated with a given fraction of variance explained  
 784 are not easily amenable to theoretical analysis. Here, we introduce a closely related measure, namely the  
 785 participation ratio (PR) of the neural covariance eigenvalue spectrum, that obeys many of the same properties  
 786 as more traditional measures, but is in contrast, much more amenable to theoretical analysis. The PR is  
 787 defined as

$$\text{PR}(\mathbf{C}^{\text{Neuron}}) = \frac{\left(\sum_{i=1}^M \mu^i\right)^2}{\sum_{i=1}^M \mu^{i^2}} = \frac{[\text{Tr } \mathbf{C}^{\text{Neuron}}]^2}{\text{Tr} [\mathbf{C}^{\text{Neuron}}]^2} = \frac{\left[\sum_{i=1}^M \mathbf{C}_{ii}^{\text{Neuron}}\right]^2}{\sum_{i,j=1}^M [\mathbf{C}_{ij}^{\text{Neuron}}]^2} \quad (11)$$

788 Like the fraction of variance explained measure, the participation ratio is also invariant to an overall scaling  
 789 of eigenvalues. The PR is often used in statistical mechanics to quantify the number of active degrees of  
 790 freedom in a thermally fluctuating system. Here we are using it to measure how many dimensions of the  
 791 eigen-spectrum are active, relative to the total variance.

792 To gain an intuitive understanding of the participation ratio, let us consider an exactly rank- $D$  neural  
 793 covariance matrix  $\mathbf{C}^{\text{Neuron}}$  with variance evenly spread across  $D$  dimensions: i.e.  $\mu_\alpha = \mu$  for  $\alpha \leq D$ ,  
 794 and  $\mu_\alpha = 0$  for  $\alpha > D$ . The PR is invariant to the overall scale  $\mu$  and evaluates exactly to  $D^2/D = D$   
 795 as expected. For a more complex example, consider the eigenvalue spectrum of a typical trial-averaged  
 796 dataset with full-rank but exponentially decaying eigenvalues:  $\mu_\alpha = \mu e^{-\frac{\alpha}{D}}$ . The spectrum's PR is again  
 797 independent of the overall scale  $\mu$  and evaluates to  $2D$  in the limit that  $D \ll M$ , which is an intuitively  
 798 sensible answer, and this value of dimensionality explains roughly 86% of the total variance. As we will  
 799 further demonstrate below in more examples, the PR and the the measure of dimensionality  $D(r)$  based  
 800 on a fraction  $r$  of variance explained, are often scaled versions of each other with the scaling constant  
 801 depending on the shape of the eigenvalue spectrum. Moreover, for several typical spectra, keeping a number  
 802 of dimensions equal to the PR leads to a fraction of variance explained between 80% to 90%.

803 While closely related to fraction of variance explained, the considerable theoretical advantage of the  
 804 PR as a dimensionality measure is that it is an exceedingly simple function of the matrix elements of the  
 805 neural covariance  $\mathbf{C}^{\text{Neuron}}$ . In particular, the numerator and denominator in Eq. (11) are simple quadratic  
 806 functions of the matrix elements. In contrast the eigenvalues  $\mu_\alpha$  are highly complex functions of the matrix  
 807 elements, as they are roots of the characteristic polynomial  $\mathcal{P}(\mu) = \det [\mathbf{C}^{\text{Neuron}} - \mu \mathbf{I}]$ , whose coefficients  
 808 themselves are polynomials in the matrix elements of  $\mathbf{C}^{\text{Neuron}}$  of all degrees ranging from 0 to  $M$ . In turn,  
 809  $D(r)$  defined in Eq. (10), as a nontrivial function of the eigenvalue spectrum, inherits this complexity as  
 810 a function of the matrix elements of  $\mathbf{C}^{\text{Neuron}}$ . Thus the PR is a singular measure in that it embodies many  
 811 of the intuitive properties we would associate with the notion of dimensionality, and is well correlated with  
 812 traditional measures of dimensionality, yet it retains considerable analytical simplicity as a direct function  
 813 of the matrix elements of  $\mathbf{C}^{\text{Neuron}}$ .

## 814 II.III A duality between neuronal dimension and task dimension

815 While the  $M$  by  $M$  neuronal covariance matrix  $\mathbf{C}^{\text{Neuron}}$  is widely used for dimensionality reduction, and  
 816 yields a set of neural basis patterns from which a dynamical portrait may be constructed, the overall structure  
 817 or pattern of its matrix elements,  $\mathbf{C}_{ij}^{\text{Neuron}}$  is usually nonintuitive and cannot be succinctly summarized. (See  
 818 Supplementary Fig. 6A). Alternatively, consider the closely related  $N_T$  by  $N_T$  task covariance matrix,

$$\mathbf{C}^{\text{Task}} = \frac{1}{M} \mathbf{X}^T \mathbf{X}. \quad (12)$$



819 While the matrix elements  $C_{ij}^{\text{Neuron}}$  reflect how the firing rates of neurons  $i$  and  $j$  co-vary across  $N_T$  task  
 820 parameters, the matrix elements  $C_{ab}^{\text{Task}}$  reflect how similar (if positive) or different (if negative) the neural  
 population activity patterns across  $M$  neurons are for two different task conditions  $a$  and  $b$ .

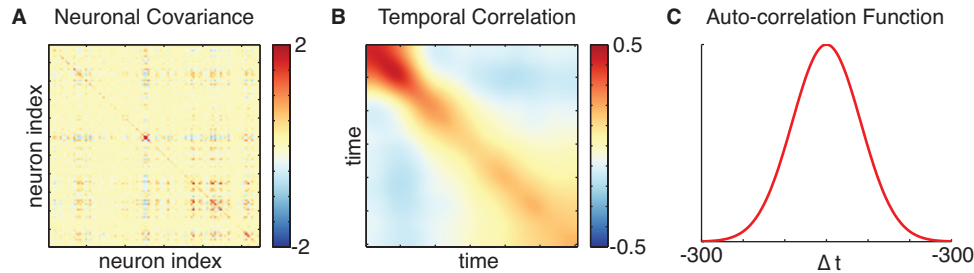

**Supplementary Figure 6:** Neuron-by-neuron covariance versus task-by-task correlation. **A.** The complex  $M$  by  $M$  neuron-by-neuron covariance matrix for reaches to a single direction in Monkey H ( $M = 109$  recorded neurons. )  $C^{\text{Neuron}}$ , of the motor cortical data recorded from a monkey reaching to a single target; **B.** The corresponding  $N_T$  by  $N_T$  time-by-time task correlation matrix,  $C^{\text{Task}}$ , where  $N_T = 600$ , corresponding to the  $T = 600$ ms duration of a trial averaged reach with bin width 1ms. **C.** Example Gaussian auto-correlation function for a stationary task. Here the auto-correlation function is  $f(\Delta t/\tau)$  where the time-scale  $\tau = 125$ ms and  $f(x)$  is a Gaussian profile of variance 1.

821

822 A well known property of linear algebra [Strang and Aarikka, 1986] is that the nonzero eigenvalues of  
 823  $C^{\text{Task}}$  are exactly the same as the nonzero eigenvalues of  $C^{\text{Neuron}}$  (after a global rescaling of  $\frac{N_T}{M}$  due to the  
 824 specific normalizations chosen in Eq. (8) and (12)). This implies that any measure of dimensionality based  
 825 on a scale invariant function of eigenvalue spectra (this of course includes both  $D(r)$  and PR), will be exactly  
 826 the same, no matter whether it is computed with the spectrum of  $C^{\text{Neuron}}$  or  $C^{\text{Task}}$ . It is this precise sense in  
 827 which neural dimensionality and task dimensionality are inextricably linked.

828 The advantage of  $C^{\text{Task}}$  is that the overall structure or pattern of its matrix elements are often much  
 829 easier to understand intuitively, and therefore to simplify. Compare for example Supplementary Fig. 6A to  
 830 Supplementary Fig. 6B, as an example of a dual pair of  $C^{\text{Neuron}}$  and  $C^{\text{Task}}$  in the case of a simple task in  
 831 which the only task parameter is time into a reach. While the former matrix elements are difficult to interpret,  
 832 the latter are simple. They reflect the simple fact that patterns of neural activity are more similar to each  
 833 other the more closely they occur in time relative to each other. When the neuronal dimensionality, measured  
 834 through the PR, is computed using  $C^{\text{Task}}$  instead of  $C^{\text{Neuron}}$  in (11), it is clear that neural dimensionality is  
 835 a very simple function of the similarity of neural activity patterns across pairs of task parameters. This is a  
 836 key observation that will drive our theory below.

#### 837 II.IV Dimensionality of simple stationary tasks unfolding over time

838 To gain further intuition behind the PR, and its relation to  $D(r)$ , we consider the calculation of both in the  
 839 special case of a simple task indexed only by time, where the task covariance matrix is *stationary* (up to  
 840 boundary effects due to finite time  $T$ ), which means that the similarity of two neural population activity  
 841 patterns at two different times depends only on the relative time difference; i.e.  $C_{t_1, t_2}^{\text{Task}} = f(|t_1 - t_2|/\tau)$ ,  
 842 where  $f(x)$  is a smooth and symmetric auto-correlation function (Supplementary Fig. 6C). Here we have  
 843 separated our description of the autocorrelation function into an intrinsic time scale  $\tau$ , and an overall shape  
 844  $f(x)$  which takes as its argument a dimensionless ratio of actual time separation to  $\tau$ . The width of  $f(x)$  as  
 845 a function of  $x$  is chosen to be  $O(1)$ .

846 Now, while in any given experiment,  $\mathbf{C}_{t_1, t_2}^{\text{Task}}$  will never exactly be of this stationary form, we show  
 847 below that we can always find a best stationary approximation to  $\mathbf{C}_{t_1, t_2}^{\text{Task}}$ , and that the dimensionality of  
 848 this approximate stationary version of the task is higher than that of the original. Therefore, understanding  
 849 the dimensionality of idealized stationary tasks becomes important, and also relevant to understanding the  
 850 dimensionality of more general non-stationary tasks.

851 To begin, we first note that  $\mathbf{C}_{t_1, t_2}^{\text{Task}}$  is of course a symmetric matrix, but also a Toeplitz matrix, as its  
 852 diagonal elements  $\mathbf{C}_{t, t}^{\text{Task}}$  and off diagonal elements  $\mathbf{C}_{t, t+\Delta t}^{\text{Task}}$ , are independent of time  $t$ . As the size of such  
 853 a  $T$  by  $T$  matrix becomes large, summations of any continuous function,  $F(\cdot)$ , of the matrix's eigenvalues,  
 854 like the numerator and denominator of the PR in Eq. (11), can be expressed using the Fourier transform of  
 855 its central row [Gray, 1972], which is a discretized version of the auto-correlation function,  $f(t/\tau)$ . If we  
 856 denote the Fourier transform of this autocorrelation by

$$\hat{f}(\omega) = \lim_{T \rightarrow \infty} \sum_{t=-T/2}^{T/2} f(t/\tau) e^{i\omega t}, \quad (13)$$

857 which exists as long as  $f(x)$  is absolutely summable, then we have

$$\lim_{T \rightarrow \infty} \frac{1}{T} \sum_{j=0}^{T-1} F(\mu_j) = \frac{1}{2\pi} \int_{-\pi}^{\pi} d\omega F(\hat{f}(\omega)), \quad (14)$$

858 In practice, when the Toeplitz task-by-task correlation matrix is of a finite size  $T$ , the above expression still  
 859 yields an accurate approximation under some restrictions: first, the stationary task needs to be in the regime  
 860 where the duration of the task is much longer than the neural activities' characteristic time scale, i.e.  $T \gg \tau$ .  
 861 Second, when the recorded firing rates are discretized, binned or smoothed before analysis, the bin size or  
 862 the smoothing kernel of the trial-averaged data needs to be much smaller than characteristic time scale. In  
 863 other words, if  $dt$  is the temporal bin-width, then  $\tau \gg dt$  is needed for the approximation to be accurate.

864 Since both assumptions hold to a reasonable approximation in most large scale recordings collected in  
 865 neuroscience today, we use Eq. (13) and Eq. (14) to compute the neural dimensionality of a stationary task.  
 866 First, we reformulate the participation ratio in terms of the Fourier transform of the auto-correlation function  
 867 governing the task-by-task correlation matrix,

$$\text{PR}(\mathbf{C}^{\text{Task}}) \approx \frac{T}{2\pi} \frac{\left( \int_{-\pi}^{\pi} d\omega \hat{f}(\omega) \right)^2}{\int_{-\pi}^{\pi} d\omega \hat{f}(\omega)^2}. \quad (15)$$

We then approximate the numerator term,

$$\begin{aligned} \int_{-\pi}^{\pi} d\omega \hat{f}(\omega) &= \lim_{T \rightarrow \infty} \sum_{t=-T/2}^{T/2} f(t/\tau) \int_{-\pi}^{\pi} d\omega e^{i\omega t} \\ &= \lim_{T \rightarrow \infty} \sum_{t=-T/2}^{T/2} f(t/\tau) \frac{2 \sin(\pi t)}{t} \\ &= 2\pi f(0), \end{aligned}$$

and the denominator term,

$$\begin{aligned}
 \int_{-\pi}^{\pi} d\omega \hat{f}(\omega)^2 &= \lim_{T \rightarrow \infty} \sum_{t_1, t_2 = -T/2}^{T/2} f(t_1/\tau) f(t_2/\tau) \int_{-\pi}^{\pi} d\omega e^{i\omega(t_1 - t_2)} \\
 &= \lim_{T \rightarrow \infty} \sum_{t = -T/2}^{T/2} 2\pi f(t/\tau)^2 && \text{(Integral evaluates to } 2\pi\delta_{t_1, t_2}\text{)} \\
 &\approx 2\pi \int_{-\infty}^{\infty} dt f(t/\tau)^2 && (T \gg \tau \gg 1, \text{ Summation by integration)} \\
 &= 2\pi\tau \int_{-\infty}^{\infty} dt f(t)^2, && \text{(Perform the change of integration variable } t/\tau \rightarrow t\text{)}
 \end{aligned}$$

868 to obtain  $C^{\text{Task}}$ 's participation ratio in terms of the task's stationary auto-correlation function,

$$\text{PR} = \frac{f(0)^2}{\int_{-\infty}^{\infty} dt f(t)^2} \frac{T}{\tau}. \quad (16)$$

869 Interestingly, the measured dimensionality of neural state space dynamics associated with a simple stationary  
 870 task scales linearly with the ratio of  $T/\tau$ , with the constant of proportionality depending only on the shape  
 871 of the auto-correlation function  $f(x)$ . This result is the mathematical instantiation of the intuition embodied  
 872 in Fig. 3C of the main paper, namely that a neural trajectory of duration  $T$  and autocorrelation with intrinsic  
 873 timescale  $\tau$  can explore at most order of magnitude  $\frac{T}{\tau}$  dimensions, because one must wait an amount of time  
 874  $\tau$  before the neural trajectory can bend enough to explore another dimension. The constant of proportionality  
 875 in Eq. (16) is, for a wide variety of autocorrelation profiles  $f(x)$ , typical of neural data, simply an  $O(1)$  pre-  
 876 factor, which we explore next.

## 877 II.V Example stationary tasks: relation between participation ratio and fraction of variance ex- 878 plained

879 For concreteness, and further intuition, we compute the two measures of dimensionality, PR and  $D(r)$   
 880 for some example stationary tasks, with their respective auto-correlation functions. For the exponential,  
 881  $f(t/\tau) = e^{-|t|/\tau}$ , the Gaussian,  $f(t/\tau) = e^{-t^2/\tau}$  and the power-law,  $f(t/\tau) = (|t|/\tau + \alpha)^{-\beta}$ , auto-  
 882 correlation functions, we tabulate the analytical expressions for their participation ratio in Supplementary  
 883 Table 1. In all three cases, their Fourier transforms are decreasing functions in frequency, which allows us  
 884 to compute the dimensionality  $D(r)$  associated with a given fraction  $r$  of variance explained:

$$D(r) = \frac{T}{\pi} \left( \arg \min_{\omega^*} \frac{\int_{-\omega^*}^{\omega^*} d\omega \hat{f}(\omega)}{\int_{-\pi}^{\pi} d\omega \hat{f}(\omega)} \geq r \right). \quad (17)$$

885 We obtain simple analytical expressions for  $D(r)$  in Supplementary Table 1 for the exponential and Gaussian  
 886 auto-correlation functions. In these cases, just like the PR,  $D(r)$  also scales linearly with  $T/\tau$  for any  
 887 given desired  $r$ , indicating a semblance of universality in the conclusion that any reasonable measure of  
 888 dimensionality is proportional to  $T/\tau$  for a simple stationary task with intrinsic autocorrelation time scale  
 889  $\tau$ . This holds true regardless of the particular fraction of variance  $r$  desired in the measure  $D(r)$ , or the  
 890 particular shape of the autocorrelations (exponential or Gaussian) we have examined.

|        | $f(t/\tau) = \exp(- t /\tau)$                                   | $f(t/\tau) = \exp(-t^2/\tau^2)$                         | $f(t/\tau) = ( t /\tau + \alpha)^{-\beta}$  |
|--------|-----------------------------------------------------------------|---------------------------------------------------------|---------------------------------------------|
| PR     | $\frac{T}{\tau}$                                                | $\sqrt{\frac{2}{\pi}} \frac{T}{\tau}$                   | $\frac{2\beta - 1}{2\alpha} \frac{T}{\tau}$ |
| $D(r)$ | $\tan\left(\frac{\pi r}{2}\right) \frac{1}{\pi} \frac{T}{\tau}$ | $\operatorname{inverf}(r) \frac{2}{\pi} \frac{T}{\tau}$ | -                                           |

**Supplementary Table 1:** Analytical expressions for the participation ratio and the fractional variance explained dimensionality measures for the Gaussian, exponential and power-law auto-correlation functions.

891 However, more quantitatively, what fraction of variance is actually explained by keeping a number of  
 892 dimensions equal to the PR in these examples? This fraction  $r$  of variance explained corresponds to the  
 893 solution to the equation  $D(r) = \text{PR}$ . For the exponential case, this equation reduces to  $\tan\left(\frac{\pi r}{2}\right) = \pi$ , which  
 894 has an approximate solution of  $r = 0.8$ . For the Gaussian case, this equation reduces to  $\operatorname{inverf}(r) = \sqrt{\frac{\pi}{2}}$ ,  
 895 or  $r = \operatorname{erf}\left(\sqrt{\frac{\pi}{2}}\right) = 0.92$ .

896 We verify the correctness of these analytical expressions by comparing them against measured dimension-  
 897 alities of numerically generated temporal correlation matrices under a variety of parameter combina-  
 898 tions (Supplementary Fig. 7A,B). Overall, for both PR and  $D(r)$  (with  $r = 0.9$ ), the numerical results show  
 899 excellent agreement with our analytical expressions throughout the range of simulated  $T/\tau$  values (Supple-  
 900 mentary Fig. 2A,B). For the the dimensionality measure  $D(r)$  applied to the power-law auto-correlation  
 901 function, the linear scaling with  $T/\tau$  is numerically evident, despite the lack of an analytical formula.

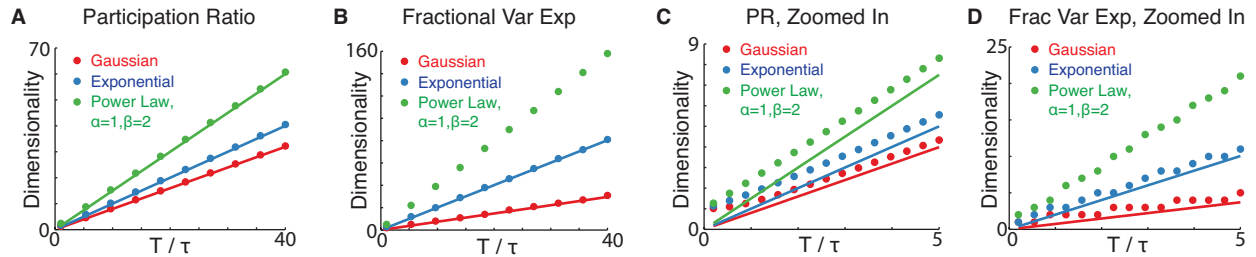

**Supplementary Figure 7:** Numerical verifications of analytically computed participation ratios and fractional variance explained for the Gaussian, exponential and power-law auto-correlation functions. **A, B.** Analytical (lines) versus simulated (circles) participation ratio and fractional variance explained measured of dimensionality in the regime with large  $T/\tau$ . **C, D.** Same as **A, B**, except zoomed in to show the small  $T/\tau$  regime.

902 For completeness, we also conducted a comparison between the analytic approximations for dimension-  
 903 ality and their direct numerical calculation when  $T/\tau$  is small, a regime in which the assumptions required  
 904 for the accuracy of the analytical approximation to the eigenspectra of Toeplitz matrices in Eq. (14) are vi-  
 905 olated. As shown in the zoomed-in views (Supplementary Fig. 7C,D), the main deviation, in this regime, of  
 906 the correct numerical result from its analytical approximation is a constant under-estimation by the analytical  
 907 approximation. This deviation is simple to understand: if we consider a dataset with just two data points (so  
 908 that the duration  $T$  equals the bin-width  $dt$ , which could be much less than the autocorrelation time  $\tau$  - i.e.  
 909  $T = dt \ll \tau$ ), the measured dimensionality will always be one, corresponding to the line connecting them,  
 910 regardless of how close they are in time. The analytical expressions above for dimensionality are not valid in

911 this regime, which violates the condition  $dt \ll \tau \ll T$  necessary for accuracy of the analytic approximation  
912 to the eigenspectra of Toeplitz matrices in Eq. (14).

913 In summary, for a stationary task, characterized by an intrinsic autocorrelation time scale  $\tau$  and total  
914 duration  $T$ , and sampled in time using bin width  $dt$ , both measures of dimensionality,  $D(r)$  for any  $r$   
915 and PR, are proportional to  $T/\tau$  in the experimentally relevant regime  $dt \ll \tau \ll T$ , independent of the  
916 particular shapes of the auto-correlation function we have considered (exponential, Gaussian, and power  
917 law), and independent of the bin-width. Moreover, for a variety of typical auto-correlation functions, a  
918 number of dimensions equal to the PR explains about 80% to 90% of neural population variance in the data.  
919 Having now described the PR, and demonstrated its utility as a sensible measure of dimensionality, as well  
920 as its similarity to the more traditional measure  $D(r)$ , we focus on the PR in our subsequent theoretical  
921 development, due to its theoretical simplicity.

### 922 III Towards Neural Task Complexity: upper bounds on dimensionality through 923 destruction of structure

924 We now aim to address the first order of magnitude discrepancy in systems neuroscience that we consider  
925 in this work, namely that the dimensionality of neural state space dynamics is often far less than the number  
926 of recorded neurons, as exemplified by the meta-analysis of 20 datasets in Fig. 2 of the main paper. We  
927 seek to explain the origin of this underlying simplicity. Our approach is to ask how high dimensional trial  
928 averaged neural state space dynamics could possibly be, given a limited extent of behavioral task parameters  
929 visited throughout any given experiment, and the smoothness of neural activity patterns across these task  
930 parameters. To address this, we describe a sequence of successive destructions of structure in neural state  
931 space dynamics, and prove that each destruction of structure necessarily increases the dimensionality of the  
932 dynamics. At the end point of this sequence of destruction, we are left with an exceedingly simple neural  
933 state space dynamics that has no structure whatsoever, above and beyond a limited volume and smoothness.  
934 The dimensionality of this resulting destroyed state space dynamics is by definition the neural task complex-  
935 ity (NTC) of the original state space dynamics, and by construction, this NTC constitutes an upper bound on  
936 the dimensionality of the original state space dynamics.

937 As described in the previous section, the structure of neural state space dynamics is well characterized by  
938 the  $N_T$  by  $N_T$  task correlation matrix  $\mathbf{C}^{\text{Task}}$ , and because of the duality between neural dimensionality and  
939 task dimensionality described above, we can compute neural dimensionality, as measured by its participation  
940 ratio, by replacing  $\mathbf{C}^{\text{Neuron}}$  with  $\mathbf{C}^{\text{Task}}$  in (11), obtaining,

$$\text{PR} = \frac{\left[ \sum_{a=1}^{N_T} \mathbf{C}_{aa}^{\text{Task}} \right]^2}{\sum_{a,b=1}^{N_T} \left[ \mathbf{C}_{ab}^{\text{Task}} \right]^2}. \quad (18)$$

941 Any destruction of structure in the neural state space dynamics corresponds to a manipulation of the matrix  
942 elements  $\mathbf{C}_{ab}^{\text{Task}}$ , that essentially alters the correlation between the neural state, as a pattern of activity across  
943  $M$  neurons, at two different task parameter values  $a$  and  $b$ .

#### 944 III.I Increasing dimensionality by reducing long-range correlation

945 The simplest destruction of structure in  $\mathbf{C}^{\text{Task}}$  is simply to reduce the magnitude of any off-diagonal element  
946  $\mathbf{C}_{ab}^{\text{Task}}$  for  $a \neq b$ . This decreases a single term in the denominator of (18) without changing the numerator,  
947 which only depends on the diagonal elements  $\mathbf{C}_{aa}^{\text{Task}}$ , and therefore increases the dimensionality. Intuitively,

948 reducing the squared correlation between neural activity patterns at two different task parameters allows the  
 949 resulting dynamics to explore more dimensions.

950 As specific example, consider a single periodic neural trajectory that is confined to oscillate with period  
 951  $\tau$ . Then the task parameter  $a$  indexes time  $t$ , and the task correlation matrix  $\mathbf{C}_{t_1 t_2}^{\text{Task}}$  has peaks in off-diagonal  
 952 bands whenever  $t_1 - t_2$  is an integer multiple of  $\tau$ , reflecting the fact that after every time  $\tau$ , the neural  
 953 dynamics is forced to revisit the same neural activity pattern by virtue of the oscillation. Consider instead a  
 954 destroyed dynamics in which all off-diagonal elements  $\mathbf{C}_{t_1 t_2}^{\text{Task}}$  are set to 0 for all  $|t_2 - t_1| \geq \frac{\tau}{2}$ . The resulting  
 955 destroyed dynamics only has a central band of correlation for  $|t_2 - t_1| \leq \frac{\tau}{2}$ , reflecting the smoothness in  
 956 time, but not the periodicity, of the original dynamics. The destroyed dynamics behaves more like a smooth  
 957 random walk with an approximate autocorrelation time  $\tau$ , that never revisits the same point in neural state  
 958 space over long times, and therefore can explore more dimensions than the original periodic dynamics. In  
 959 this sense, the destruction of long-range temporal correlations necessarily increases dimensionality.

### 960 III.II Increasing dimensionality by homogenizing dynamics

961 A second way to destroy structure in the task-by-task correlation matrix  $\mathbf{C}_{ab}^{\text{Task}}$  is to homogenize it by re-  
 962 placing each of a subset of the matrix's off-diagonal entries with their average. This replacement increases  
 963 dimensionality by again reducing PR's denominator, without affecting the numerator, which only depends  
 964 on diagonal elements. To see this, first consider Jensen's inequality, which states that for any convex function  
 965  $g$ ,

$$\langle g(x) \rangle \geq g(\langle x \rangle),$$

966 where  $x$  is any random variable drawn from a distribution  $P(x)$ , and  $\langle \cdot \rangle$  denotes an average with respect  
 967 to this distribution. To apply Jensen's inequality, consider a specific subset of  $K$  off diagonal elements  
 968 of  $\mathbf{C}_{ab}^{\text{Task}}$ , indexed by  $\gamma = 1, \dots, K$ , taking the values  $x_\gamma$ . Here each  $\gamma$  indexes a particular pair of task  
 969 parameters  $(ab)$  with  $a \neq b$ , and  $x_\gamma$  is the value  $\mathbf{C}_{ab}^{\text{Task}}$ . Let the distribution  $P(x) = \frac{1}{K} \sum_{\gamma=1}^K \delta(x - x_\gamma)$ .  
 970  $P(x)$  places equal probability mass on the chosen elements. Also let  $g$  be the convex function  $g(x) = x^2$ .  
 971 Then according to Jensen's inequality, the average of the squares of  $x_1, \dots, x_K$  is greater than or equal to  
 972 their average squared, or

$$\frac{1}{K} \sum_{\gamma=1}^K x_\gamma^2 \geq \left( \frac{1}{K} \sum_{\gamma=1}^K x_\gamma \right)^2.$$

973 If we denote the average by  $\bar{x} = \frac{1}{K} \sum_{\gamma=1}^K x_\gamma$ , this means that replacing each  $x_\gamma$  with the average value  $\bar{x}$   
 974 leads to a smaller denominator in Eq. (18), since the above inequality implies  $\sum_{\gamma=1}^K x_\gamma^2 \geq \sum_{\gamma=1}^K \bar{x}^2 = K \bar{x}^2$ .  
 975 By reducing the denominator of the PR without changing the numerator, the dimensionality goes up.

976 Thus intuitively, any inhomogeneities in the off diagonal task-task correlation matrix  $\mathbf{C}_{ab}^{\text{Task}}$  reflect in-  
 977 herent structure in the neural state space dynamics, through different degrees of similarity between neural  
 978 activity patterns at different pairs of task parameters  $a$  and  $b$ . Destroying such structure by homogenizing it,  
 979 i.e. replacing a subset of off-diagonal elements by their average, necessarily increases the dimensionality of  
 980 the resulting destroyed dynamics.

### 981 III.III The best stationary approximation to a task has higher dimensionality than the original task

982 A simple, but important application of the above method for destroying structure is the result that the best  
 983 stationary approximation of the task-by-task correlation matrix associated with a single task parameter (Sup-  
 984 plementary Fig. 8A,B) has increased dimensionality. Consider a simple task where the task parameter  $a$

indexes time  $t$  only. In general such a task will be non-stationary, so that the matrix elements  $\mathbf{C}_{t_1 t_2}^{\text{Task}}$  will not be a function of the time separation  $|t_2 - t_1|$  only. What is the best stationary approximation to this neural dynamics, described by a corresponding stationary task-task covariance matrix  $\mathbf{C}_{t_1 t_2}^{\text{Sta}} = f(|t_2 - t_1|)$ , where by definition, the best one minimizes the squared error

$$\mathcal{E} = \sum_{t_1, t_2} (\mathbf{C}_{t_1 t_2}^{\text{Task}} - \mathbf{C}_{t_1 t_2}^{\text{Sta}})^2.$$

By the usual result that the single number  $\bar{x}$  that minimizes the squared distance to a fixed collection of  $K$  numbers  $x_1, \dots, x_K$  is the average of those numbers,  $\bar{x} = \frac{1}{K} \sum_{\gamma=1}^K x_\gamma$ , it is easy to see that the best stationary approximation is the one that averages the diagonals and off-diagonals of  $\mathbf{C}^{\text{Task}}$ :

$$\mathbf{C}_{t_1, t_2}^{\text{Sta}} = \left\langle \mathbf{C}_{t, t+(t_2-t_1)}^{\text{Task}} \right\rangle_t = F(|t_2 - t_1|). \quad (19)$$

When  $t_2 \neq t_1$  the average corresponds to homogenizing in time an off-diagonal band of  $\mathbf{C}^{\text{Task}}$ , which by the above section increases dimensionality by decreasing the denominator of the PR in (18). However, the diagonal band is also averaged. Fortunately, this does not change the numerator of the PR, which is simply the sum of the diagonals squared. Thus overall, the best stationary approximation to a task, by destroying structure in the original task associated with temporal inhomogeneities, has increased dimensionality relative to the original task. See Supp. Fig. 8AB for an example of a non-stationary task and its best stationary approximation. In neural data analyzed in this work, this best stationary approximation is very well modeled by a Gaussian shaped autocorrelation profile (Supp. Fig. 8C).

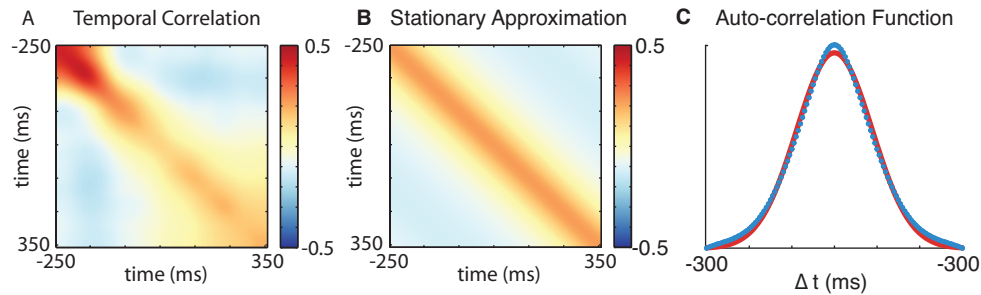

**Supplementary Figure 8:** Example stationary approximation of a trial-averaged dataset. **A.** The task-by-task correlation matrix,  $\mathbf{C}^{\text{Task}}$ , of motor cortical state space dynamics while Monkey H is reaching to a single target. **B.** The best stationary approximation  $\mathbf{C}^{\text{Sta}}$  to  $\mathbf{C}^{\text{Task}}$  obtained by replacing the diagonal and the off-diagonals with their respective averages. **C.** A Gaussian fit (red) to the measured auto-correlation function of the best stationary approximation (blue).

999

In general, once we have the best stationary approximation  $\mathbf{C}^{\text{Sta}}$  and its associated autocorrelation function  $F(\Delta t)$ , we can proceed in one of several ways to obtain an upper bound on the dimensionality of the original neural state space dynamics described by  $\mathbf{C}^{\text{Task}}$ . First, a natural further destruction of structure is to destroy long range correlations, as described above, by setting to 0  $F(\Delta t)$  for  $|\Delta t|$  greater than some threshold, which is chosen to include the central peak of  $F$  near the origin, but exclude other structure associated with peaks in  $F$  away from the origin. This process is designed to obtain dimensionality upper bounds that incorporate local smoothness alone, and no other longer range structure.

With this modified  $F$  one could write  $F$  in the form  $F(\Delta t) = f(\Delta t/\tau)$ , thereby separating the width of the central peak of  $F$ , as described by  $\tau$ , and the shape of the central peak of  $F$ , as described by the function

1007

1008

1009  $f(x)$  which has width in its dimensionless argument  $x$  of  $O(1)$ . Then the resulting dimensionality upper  
1010 bound is given by Eq. (16). This dimensionality upper bound is proportional to  $T/\tau$ , up to a constant  $O(1)$   
1011 factor that depends on the detailed shape of  $f(x)$ . It turns out that in the neural data analyzed in this paper,  
1012 the shape of  $f(x)$  was well approximated by a Gaussian profile, yielding the constant factor  $\sqrt{\frac{2}{\pi}}$  and the  
1013 resulting NTC for a single task parameter of

$$\text{NTC} = \sqrt{\frac{2}{\pi}} \frac{T}{\tau}, \quad (20)$$

1014 reported in the main paper.

1015 Now this procedure for obtaining an NTC that upper-bounds neural dimensionality seems to depend on  
1016 knowing many details of the neural data beforehand. However, it is exceedingly easy to estimate a likely  
1017 NTC *before* the neural data is collected. Basically, one simply needs to estimate  $\tau$ , the approximate width  
1018 of the central peak of the temporal autocorrelation function of the neural trajectory, and know the total  
1019 duration  $T$  of the neural trajectory. One need not know in detail the exact shape of the central peak, as this  
1020 only contributes an  $O(1)$  constant of proportionality. For example, if it is Gaussian then this constant is  
1021  $\sqrt{\frac{2}{\pi}} = 0.8$ , while if it is exponential then it is 1 (see e.g. Supp. Table 1). However, when one is attempting  
1022 to explain 1 to 2 order of magnitude discrepancies between neural dimensionality and number of recorded  
1023 neurons, then these  $O(1)$  differences in NTC due to different shapes of the auto-correlation function are  
1024 not that important. Similarly, when one is attempting to estimate a likely NTC in future recordings for the  
1025 purposes of designing experiments, these  $O(1)$  differences again are not as important - i.e. they may not be  
1026 the dominant source of estimation error.

### 1027 **III.IV For multiple task parameters, a factorized stationary approximation to a task has higher** 1028 **dimensionality**

1029 For datasets with  $K$  task parameters, the task-by-task correlation matrix has a block structure. For example,  
1030 for the eight-direction center-out reach task in shown in Figure 3D of the main paper with  $K = 2$ , the  
1031 correlation matrix consists of eight-by-eight blocks of  $T$ -by- $T$  temporal correlation or cross-correlation  
1032 matrices (Supplementary Fig. 9A): entries of the  $(1, 1)$  block denote the correlations between neural activity  
1033 patterns at different time points for reaches to the first target, whereas entries of the  $(1, 2)$  block denote the  
1034 cross-correlations between neural activity patterns at some time during the reach to the first target and at a  
1035 different time during the reach to the second target.

1036 To upper bound the dimensionality of such compound correlation matrices, with multiple task param-  
1037 eters, we destroy structure in a specific way that leads to a stationary and factored approximation to the  
1038 original correlation matrix. The dimensionality of this stationary factored approximation is then defined  
1039 to be the NTC, and by construction, it upper bounds the dimensionality of the original data. To arrive at  
1040 the stationary factorized approximation, we follow a two-step procedure (Supplementary Fig. 9B). The first  
1041 step is to obtain a stationary approximation to the original task covariance matrix, using an extension of the  
1042 logic we used in the  $K = 1$  parameter case. With  $K$  parameters, the task manifold in parameterized by a  
1043  $K$ -tuple of numbers  $(t^1, \dots, t^K)$ . Let two  $K$ -tuples,  $(t_1^1, \dots, t_1^K)$  and  $(t_2^1, \dots, t_2^K)$  denote two points on the  
1044 task manifold, and let the task correlation matrix  $\mathbf{C}_{(t_1^1, t_1^2), \dots, (t_1^K, t_2^K)}^{\text{Task}}$  denote the correlation between the two  
1045 neural activity patterns associated with two points on this task manifold. In general, this task correlation will  
1046 not be stationary, in that it will not be a function of only differences between points, i.e. of  $\Delta t^k = t_2^k - t_1^k$ .



1047 We can find the best stationary approximation by averaging along off-diagonals through

$$\mathbf{C}_{(t_1^1, t_2^1), \dots, (t_1^K, t_2^K)}^{\text{Task}} \approx \left\langle \mathbf{C}_{(t^1, t_2^1 - t_1^1), \dots, (t^K, t_2^K - t_1^K)}^{\text{Task}} \right\rangle_{t^1, \dots, t^K} = f^{\text{approx}}(\Delta t^1, \dots, \Delta t^K). \quad (21)$$

1048 Via arguments similar to those presented in the previous section, the resulting stationary, block Toeplitz  
 1049 approximation of the task correlation matrix has a higher dimensionality than the original task correlation  
 1050 matrix. Interestingly, this approximation is diagonalizable, since it is an example of a Hewitt block Toeplitz  
 1051 matrix, but its correlation structure is still too complex for the resulting dimensionality upper bound to be  
 1052 intuitive and interpretable.

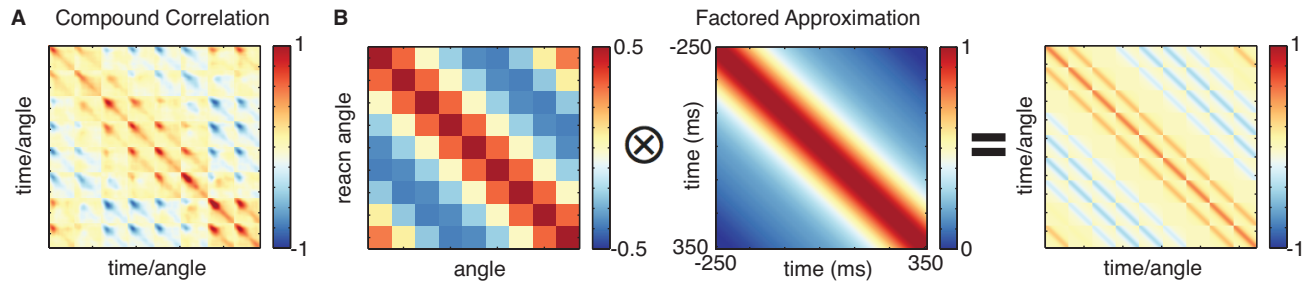

**Supplementary Figure 9:** Example stationary and factor approximation of a trial-averaged dataset of a monkey doing the eight-direction center-out reach task. **A.** The compound task-by-task correlation matrix,  $\mathbf{C}^{\text{Task}}$ , of the motor cortical data during reaches to all possible directions. Inner indexes denote time during the reaches, while the outer blocks denote the different reach targets. **B.** The factored and stationary approximation to **A** as the Kronecker product of an angle-by-angle and a time-by-time stationary correlation matrices.

1053 Instead, we apply a second approximation step to factorize the contributions of each task parameter.  
 1054 Formally, we decompose the approximate stationary compound correlation function,  $f^{\text{approx}}(\Delta t^1, \dots, \Delta t^K)$ ,  
 1055 into a product of individual task parameters' auto-correlation functions,

$$f^{\text{approx}}(\Delta t^1, \dots, \Delta t^K) \approx \prod_{k=1}^K g^k(\Delta t^k). \quad (22)$$

1056 This factorization is the same as approximating the stationary compound correlation matrix with a Kronecker  
 1057 product,

$$\mathbf{C}_{(t_1^1, t_2^1), \dots, (t_1^K, t_2^K)}^{\text{Task}} \approx \prod_{k=1}^K \mathbf{C}_{t_1^k, t_2^k}^k = \prod_{k=1}^K g^k(\Delta t^k) \quad (23)$$

where each of the component matrix is a task parameter's stationary correlation matrix, whose NTC and dimensionality is given by the corresponding auto-correlation function,  $g^k(\cdot)$ . Since the resulting eigenvalues of the Kronecker product are all possible outer products of the form of  $\prod_{k=1}^K \mu^{k, i_k}$ , with  $\mu^{k, i_k}$  denotes the

$i_k$ th eigenvalue of the  $\mathbf{C}^k$  factor, the participation ratio of the factored and stationary approximation is,

$$\begin{aligned} \text{PR}\left(\prod_{k=1}^K \mathbf{C}_{t_1^k, t_2^k}^k\right) &= \frac{\left(\sum_{i_1 i_2 \dots i_K} \prod_{k=1}^K \mu^{k, i_k}\right)^2}{\sum_{i_1 i_2 \dots i_K} \prod_{k=1}^K \mu^{k, i_k}{}^2} \\ &= \frac{\prod_{k=1}^K \left(\sum_{i_k} \mu^{k, i_k}\right)^2}{\prod_{k=1}^K \sum_{i_k} (\mu^{k, i_k})^2} \\ &= \prod_{k=1}^K \text{PR}(\mathbf{C}^k) = C \frac{\prod_{k=1}^K L_k}{\prod_{k=1}^K \lambda_k}, \end{aligned}$$

1058 which is precisely the product of the NTCs for each of the task parameters.

For this approximation to be an upper bound on the original correlation matrix's dimensionality, we still need to prescribe a factorization procedure that yields a guaranteed increase in dimensionality. The factorization we choose is a recursive projection procedure, where we successively replace the off-diagonal blocks of the stationary approximation with their projections onto the diagonal blocks. In terms of the auto-correlation factors,  $g^k(\cdot)$ s, the recursive projection procedure is given by,

$$\begin{aligned} g_1(\Delta t^1) &= f^{\text{approx}}(\Delta t^1, 0, \dots, 0) & (24) \\ g_1(\Delta t^2) &= \frac{\langle g_1(\Delta t^1) f^{\text{approx}}(\Delta t^1, \Delta t^2, 0, \dots, 0) \rangle_{\Delta t^1}}{\langle g_1(\Delta t^1)^2 \rangle_{\Delta t^1}} \\ g_1(\Delta t^3) &= \frac{\langle g_1(\Delta t^1) g_2(\Delta t^2) f^{\text{approx}}(\Delta t^1, \Delta t^2, \Delta t^3, 0, \dots, 0) \rangle_{\Delta t^1, \Delta t^2}}{\langle g_1(\Delta t^1)^2 g_2(\Delta t^2)^2 \rangle_{\Delta t^1, \Delta t^2}} \\ &\vdots \end{aligned}$$

1059 To see that this procedure produces an approximation that upper bounds dimensionality, we first note that the  
 1060 numerator of the resulting approximation's participation ratio is unchanged from the stationary approxima-  
 1061 tion, since only the off-diagonal blocks are replaced by projections. Secondly, we note that the denominator  
 1062 of the participation ratio, which is the sum of squares of the off-diagonal blocks' entries, can only be de-  
 1063 creased by the projections. Consequently, the dimensionality of the factored approximation upper bounds  
 1064 that of the stationary approximation which in turn upper bounds that of the original task correlation matrix.  
 1065 For example, one can compare the original task correlation matrix (Fig. 9A) to its stationary factorized  
 1066 approximation (Fig 9B) in the case of a center out reach task studied in the main paper.

### 1067 III.V Algorithmic computation of neural task complexity

1068 Here we summarize the algorithmic steps required to compute the NTC.

1069 To compute the NTC of a trial-averaged dataset with a single task parameter,  $t$ , in practice, we have the  
 1070 following procedure:

- 1071 • Mean-subtract each neurons' averaged activity across task parameters from each row of the neurons  
 1072 by task parameter data matrix  $\mathbf{X}$ .
- 1073 • Compute data's task-by-task correlation matrix  $\mathbf{C}^{\text{Task}} = \mathbf{X}^T \mathbf{X}$ .

- 1074 • Find the best stationary approximation of  $\mathbf{C}^{\text{Task}}$ , and construct the corresponding auto-correlation  
 1075 function  $f^{\text{approx}}(\Delta t) = \left\langle \mathbf{C}_{t, t+\Delta t}^{\text{Task}} \right\rangle_t$ . If necessary, set any long-range correlations to zero, while  
 1076 keeping the short-range correlations induced by smoothness alone.
- 1077 • If  $f^{\text{approx}}(\cdot)$  can be fitted with a simple form, such as the Gaussian, exponential or power-law auto-  
 1078 correlation function whose participation ratio we've computed analytically (See Supplementary Table  
 1079 1), extract the relevant auto-correlation scale  $\tau$  and substitute it into the appropriate participation ratio  
 1080 expression to obtain the NTC.
- 1081 • If the stationary approximation has a non-classical functional form for the auto-correlation function,  
 1082 one can still compute an NTC that depends, up to an  $O(1)$  factor, on the detailed shape of this auto-  
 1083 correlation function through the formula for the PR derived in (16).

1084 To compute the NTC of a dataset with multiple task parameters, we have the following procedure:

- 1085 • Mean-subtract each neurons' activity averaged over all task parameters for rows of the data matrix  $\mathbf{X}$ .
- 1086 • Compute the compound task-by-task correlation matrix,  $\mathbf{C}^{\text{Task}} = \mathbf{X}^T \mathbf{X}$ .
- 1087 • Compute  $\mathbf{C}^{\text{Task}}$ 's stationary approximation with the averaging procedure,

$$f^{\text{approx}}(\Delta t^1, \dots, \Delta t^k) = \left\langle \mathbf{C}_{(t^1, t_2^1 - t_1^1), \dots, (t^K, t_2^K - t_1^K)}^{\text{Task}} \right\rangle_{t^1, \dots, t^K},$$

1088 and its factorization with the prescribed recursive projection procedure (24),

$$f^{\text{approx}}(\Delta t^1, \dots, \Delta t^k) \approx \prod_{k=1}^K g^k(\Delta t^k).$$

- 1089 • Compute the correlation lengths and the dimensionalities for the individual task parameter's the sta-  
 1090 tionary approximation,  $\mathbf{C}^k$ , as described for the single-parameter case. The resulting product of di-  
 1091 mensionalities is then the NTC for this dataset of multiple task parameters.

## 1092 **IV Examples of the relationship between dimensionality and neural task complex-** 1093 **ity**

### 1094 **IV.I Dimensionality and neural task complexity for discrete stimuli or behavioral conditions**

1095 Thus far, we focused on continuous task parameters that evoke smoothly evolving neural activity patterns,  
 1096 and showed how to compute a simple NTC measure that upper bounds the dimensionality of the neural data  
 1097 by taking into account only the extent of each task parameter and the neural correlation length along each  
 1098 task parameter. Is there a similar concept of NTC for stimuli or behaviors that are discrete? With  $P$  discrete  
 1099 stimuli, the resulting trial-averaged neural activity patterns can, of course, span a  $P$ -dimensional subspace  
 1100 of the neural space as long as the number of recorded of neurons exceeds that of the number of trials, i.e.  
 1101  $M \geq P$ . Thus  $P$  is a natural, if trivial, measure of NTC in this case.

1102 A more interesting quantity in this situation may be the dimensionality of a *random* data set. Consider  
 1103 for example a situation in which  $P$  stimuli or behavioral conditions, indexed by  $a = 1, \dots, P$ , yield  $P$   
 1104 random (mean subtracted) activity patterns across all  $N$  neurons in a circuit. By this we mean that the

1105 mean subtracted activity  $\mathbf{x}_{ia}$  of neuron  $i$  in stimulus  $a$  are uncorrelated across both neurons and stimuli, and  
 1106 drawn i.i.d from a Gaussian distribution of mean 0 and variance 1 (since our dimensionality measures are  
 1107 independent of overall scale, we simply normalize the variance to be 1). This means that for large  $N \gg P$ ,  
 1108 the task correlation matrix of the full neural population,  $\mathbf{C}^{\text{Task}} = \frac{1}{N} \mathbf{X}^T \mathbf{X}$ , where  $\mathbf{X}$  is the  $N$  by  $P$  data  
 1109 matrix, converges to a  $P$  by  $P$  identity matrix, and therefore has a dimensionality, measured by its PR, to be  
 1110  $P$ . This is a reflection of the fact that in very high dimensions ( $N \gg P$ ), all  $\binom{P}{2}$  pairs of random vectors in  
 1111  $N$  dimensional space are overwhelmingly likely to be close to right angles with respect to each other. Thus  
 1112 the  $P$  neural patterns form an orthogonal basis and have dimensionality  $P$ .

1113 However, the situation is very different if we don't record all  $N$  neurons, but instead record only  $M$   
 1114 neurons, where  $M$  may be the same order of magnitude as the number of stimuli/behaviors,  $P$ . The data  
 1115 matrix  $\mathbf{X}$  is then a smaller  $M$ -by- $P$  dimensional random matrix, whose entries are generated i.i.d. with zero  
 1116 mean and unit variance. In the limit in which  $M$  and  $P$  are large, while the ratio is  $O(1)$ , the distribution of  
 1117 eigenvalues of  $\mathbf{C}^{\text{Task}}$ , converges to the Marchenko-Pastur law [Marchenko and Pastur, 1967],

$$P_{\mathbf{C}^{\text{Task}}}(\mu) = \frac{1}{2\pi\mu P} \sqrt{[(\sqrt{P} + \sqrt{M})^2 - \mu][\mu - (\sqrt{P} - \sqrt{M})^2]}. \quad (25)$$

1118 This law allows us to evaluate the numerator of the PR, which is the squared sum of the eigenvalues of  
 1119  $\mathbf{C}^{\text{Task}}$ , as well as the denominator, which is the sum of squares of eigenvalues of  $\mathbf{C}^{\text{Task}}$ . The resulting  
 1120 dimensionality, or ratio of these two quantities, is simply,

$$\text{PR}^{\text{rand}} = \frac{P}{(1 + \frac{P}{M})}. \quad (26)$$

1121 This of course reduces to the previous result of dimensionality  $P$  when the number of recorded neurons  $M$   
 1122 is much larger than  $P$ . For example, if  $M = 10 \times P$ , then the measured dimensionality would be about  
 1123  $0.9 \times P$ . However, the cloud of neural activity patterns becomes geometrically distorted as we subsample  
 1124 neurons down to the point where  $M$  is not much larger than  $P$ . In that case, all  $\binom{P}{2}$  pairs of neural activity  
 1125 patterns are no longer sufficiently orthogonal, leading to a proliferation of small, but non-negligible, off  
 1126 diagonal elements in the  $P$  by  $P$  matrix  $\mathbf{C}^{\text{Task}}$  that conspire to reduce the measured dimensionality of the  
 1127 random neural dataset, relative to what one would find if one recorded all  $N$  neurons.

1128 The dimensionality  $\text{PR}^{\text{rand}}$  of a random dataset yields an interesting null model with which to compare  
 1129 dimensionality measured in actual experiments with  $P$  discrete stimuli, especially after the neural activity  
 1130 patterns have been normalized to have the same length in firing rate space. Indeed, comparison of measured  
 1131 dimensionality to this null model dimensionality, as opposed to the NTC upper bound, which is simply  $P$ ,  
 1132 provides a powerful guideline for the interpretation of neural data. When the measured dimensionality is  
 1133 far below  $\text{PR}^{\text{rand}}$ , the dataset is more correlated and lower-dimensional than what one would expect from  
 1134 random data, suggesting that circuit dynamics may be constraining neural activity patterns to live in a low  
 1135 dimensional space. On the other hand, when the measured dimensionality is higher than  $\text{PR}^{\text{rand}}$ , the neural  
 1136 circuit may be actively de-correlating neuronal activity patterns to make them more orthogonal than one  
 1137 would expect by chance.

## 1138 IV.II Random smooth manifolds have dimensionality equal to neural task complexity

We return to the case of a smooth, trial averaged neural state space dynamics in a task with  $K$  task parameters. What kind of state space dynamics would have a dimensionality that would necessarily saturate the upperbound set by the NTC, given we have recorded enough neurons  $M$ ? Intuitively, the answer is a smooth

random manifold that has the same autocorrelation lengths across task parameters and moreover factorizes across task parameters, with no other structure to further constrain its dimensionality. Such a random neural manifold for the state space dynamics is generated randomly by drawing each neuron's response given the task parameters independently from a stationary random gaussian process with covariances determined by the data's factored correlations. Formally, the joint distribution of the neural activities is Gaussian, and obeys the following,

$$\mathbf{E} [x_i(t^1, \dots, t^K)] = 0$$

$$\mathbf{Cov} [x_i(t_i^1, \dots, t_i^K) x_j(t_j^1, \dots, t_j^K)] = \delta_{ij} \prod_{k=1}^K g^k(t_j^k - t_i^k),$$

1139 where  $x_i(t^1, \dots, t^K)$  denotes neuron  $i$ 's firing rate at the point in the task manifold given by the  $K$ -tuple  
 1140  $(t^1, \dots, t^K)$ . Since the task-by-task correlation matrix of this generated manifold is exactly factored and  
 1141 stationary as specified, its measured dimensionality must saturate the NTC upper bound constrained by only  
 1142 smoothness, as long as we measure enough neurons  $M$ , so that the empirically measured autocorrelation  
 1143 functions converge in limit to those that generated them.

1144 We simulate such a smooth random manifold with  $K = 2$  and gaussian auto-correlation functions with  
 1145 circular boundaries parameterized by lengths  $L^{1,2} = 100$  and autocorrelation lengths  $\lambda^{1,2} = 12, 20$  in  
 1146 arbitrary units. This yields an NTC of 26. With a large total population of  $N = 1000$ , relative to the NTC,  
 1147 the measured participation ratio of the simulated manifold is 26, and indeed saturates the dimensionality  
 1148 upper bound set by the NTC as predicted.

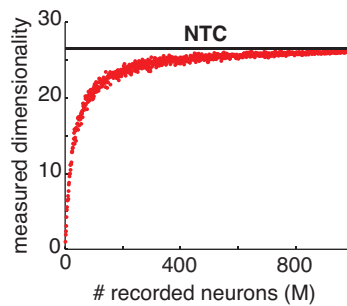

**Supplementary Figure 10:** Measured dimensionality of subsampled a random smooth manifold. A random smooth manifold with intrinsic dimensionality of 2 is generated with 1,000 simulated neurons as a Gaussian process with an NTC of 26 ( $L^{1,2} = 100, \lambda^{1,2} = 12, 20$ ). For each value of  $M$ , a random subset of the simulated neurons is kept to simulated recording. Measured participation ratios of the resulting subsampled data are plotted as function of  $M$ , and compared against the NTC (horizontal line).

1149 In practice, however, we never record from the entire population of  $N$  neurons. Suppose we only record a  
 1150 subset of  $M$  neurons. How would the measured dimensionality scale with  $M$ , and how large would  $M$  have  
 1151 to be before the measured dimensionality approached the true dimensionality of the random smooth mani-  
 1152 fold which is equal to the NTC? We answer these questions by subsampling the number of neurons in the  
 1153 generated random dataset. When plotted as a function of the number of recorded neurons,  $M$ , (Supplemen-  
 1154 tary Fig. 10), the measured participation ratio of the subsampled data stayed close to the true dimensionality  
 1155 as long as the number of recorded neurons is much higher than the NTC. Only when the number of recorded  
 1156 neurons gets closer to the NTC, does the measured dimensionality start to decrease significantly due to the  
 1157 more stringent constraint of the limited number of recorded neurons.

1158 These results are completely parallel to the case of random clouds of  $P$  points discussed in the previous  
 1159 section, as opposed to smooth manifolds discussed here. There we found that measured dimensionality  
 1160 monotonically increased with number of recorded neurons  $M$  in an analytically controllable manner (See  
 1161 Eq. (26)) ultimately saturating as  $M \gg NTC = P$ . In fact, the red curve in Fig. 10 reflecting the measured  
 1162 dimensionality as a function of number of recorded neurons, is the analog for smooth random manifolds of  
 1163 Eq. (26) for random point clouds.

#### 1164 IV.III Intrinsic constraints on neural dynamics can prevent dimensionality from approaching the 1165 NTC

1166 In this section, we demonstrate an example simulated dataset that does not saturate the NTC dimensionality  
 1167 upper bound like the *random* smooth manifold. The key idea is to generate neural firing rate patterns that are  
 1168 fundamentally constrained by neural network connectivity. In particular, we build an  $N$ -dimensional linear  
 1169 dynamical system that evolves according the difference equation,

$$\mathbf{x}^{t+1} = \mathbf{W}\mathbf{x}^t + \boldsymbol{\eta}^t, \boldsymbol{\eta}^t \sim \mathcal{N}(0, I),$$

1170 where  $\boldsymbol{\eta}^t$  is a time-dependent driving input. The length- $N$  vector  $\mathbf{x}^t$  denotes the population activity pattern  
 1171 at time  $t$ , and the  $N$ -by- $N$  connectivity matrix  $\mathbf{W}$  defines the connectivity of the network. For simplicity,  
 1172 we assume the inputs to be white noise.

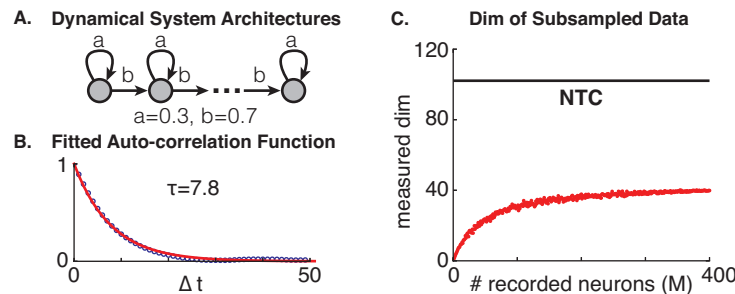

**Supplementary Figure 11:** **A.** Architectures of a non-normal linear dynamical system with non-smooth trajectories but low dimensionality. **B.** Fitted auto-correlation function of the simulated data with an exponential function. The data is simulated with  $a = 0.3$ ,  $b = 0.7$ ,  $N = 400$  and a duration of 800. **C.** Measured dimensionality of subsampled simulated data compared against the NTC.

1173 We construct a non-normal system with a distributed delay-line architecture (Supplementary Fig. 11A).  
 1174 Its connectivity has the general form,

$$\mathbf{W} = \mathbf{U} \begin{bmatrix} a & b & & & \\ & a & b & & \\ & & \ddots & \ddots & \\ & & & \ddots & a \end{bmatrix} \mathbf{U}^T,$$

1175 where  $a$  and  $b$  are the feedback and feedforward gains at each node; and  $\mathbf{U}$  is an arbitrary orthogonal matrix  
 1176 that distributes the nodes across neurons. With a reasonably large feedforward gain,  $b$ , input evoked network  
 1177 activity patterns propagate rapidly from one pattern to another associated with successive nodes, resulting

1178 in fast-changing single-neuron time courses with a low smoothness value and a high NTC. Despite the non-  
1179 smooth responses, the system, however, can still be low-dimensional. By the time an input signal propagates  
1180 to the end of the delay line, it would have incorporated feedforward amplification from all preceding nodes  
1181 so that the final variance of neural activity along the pattern associated with the last node dominates the total  
1182 variance of the entire network, resulting in very low dimensionality of the recorded data.

1183 To demonstrate a numerical example, we constructed such a non-normal system with  $N = 400$ ,  $a = 0.3$ ,  
1184  $b = 0.7$  and a random orthogonal matrix  $\mathbf{U}$ , and simulated recordings of neural activity patterns over a  
1185 duration of 800 time steps. By construction, the simulated neural activity patterns have a short characteristic  
1186 time scale of  $\tau = 7.8$  time-steps, obtained by fitting an exponential auto-correlation function to the stationary  
1187 approximation of the temporal correlation matrix. The corresponding NTC of the simulated data is then  
1188  $800/7.8 = 102$ , which is not saturated by the data's dimensionality of 40, measured by the participation  
1189 ratio (Supplementary Fig. 11C).

1190 Overall, this model constitutes an example of the elusive experimental regime (iii) in Fig. 4A of the main  
1191 paper. One need not record all  $N = 800$  neurons in the circuit for the dimensionality to stabilize. In fact the  
1192 dimensionality stabilizes already at  $M = 400$  neurons, which is about 10 times the actual dimensionality  
1193 of 40. So basically, the actual dimensionality is both much less than the number of recorded neurons *and*  
1194 much less than the NTC - the key signatures of experimental regime (iii). In this case, the gap between the  
1195 actual dimensionality and the NTC reflects an additional circuit constraint that does not arise from temporal  
1196 smoothness alone. This constraint corresponds to preferential amplification of a subset of activity patterns  
1197 associated with the nodes near the end of the hidden delay line.

## 1198 **V Neural task complexity and random projections as a theory of neural measure-** 1199 **ment**

### 1200 **V.I Review of random projection theory**

1201 Dimensionality reduction techniques such as principal component analysis attempt to reduce the dimen-  
1202 sionality of neural data in a targeted way by computing some data-dependent statistics first, such as the  
1203 covariance matrix. Alternatively, a dataset may also be dimensionally reduced by simply projecting full data  
1204 points in a high  $N$ -dimensional space (in our application with think of  $N$  as the *total* number of behaviorally  
1205 relevant neurons in a circuit) into a randomly chosen  $M$ -dimensional subspace ( $M$  will correspond to the  
1206 number of recorded neurons and is much less than  $N$ ). Despite its simplicity, random projections have  
1207 been shown to nicely preserve the geometric structure of the original high-dimensional data. This structural  
1208 preservation is measured through the fractional distortion in distance between pairs of data points before and  
1209 after the projection. Formally, for a pair of  $N$ -dimensional data points,  $\mathbf{x}_{t_1}$  and  $\mathbf{x}_{t_2}$  and an  $M$ -by- $N$  random  
1210 orthogonal projection operator  $\mathbf{P}$ , the pairwise distance distortion is defined as,

$$d_{t_1,2} = \sqrt{\frac{N}{M} \frac{\|\mathbf{P}\mathbf{x}_{t_1} - \mathbf{P}\mathbf{x}_{t_2}\|_2}{\|\mathbf{x}_{t_1} - \mathbf{x}_{t_2}\|_2}} - 1,$$

1211 where the ratio  $\sqrt{N/M}$  corrects for the expected shrinking of distances under a projection from  $N$  to  $M$   
1212 dimensions. If this distortion were equal to 0 for all possible pairs, the geometric structure of the dataset  
1213 would be preserved, since all pairs of points would have the same distance (up to an overall scale) before  
1214 and after the projection. However, when  $M < N$ , this is impossible for all pairs of points.

1215 The Johnson-Lindenstrauss lemma [Johnson and Lindenstrauss, 1984, Dasgupta and Gupta, 2003], a fun-  
1216 damental result in the theory of random projections, considers high-dimensional datasets with  $P$  arbitrary

1217 points in the high  $N$ -dimensional space. The lemma states that, with a probability of at least  $1 - \rho$ , a random  
1218 projection of the  $P$  data points into a  $M$ -dimensional subspace has bounded pairwise distance distortions  
1219 for *all* possible pairs,

$$-\epsilon \leq d_{ij} \leq +\epsilon, \forall i, j$$

1220 as long as the target subspace's dimensionality,  $M$ , is of the order,

$$M \sim \mathcal{O}\left(\frac{1}{\epsilon^2} \log \frac{P}{\rho}\right),$$

1221 where  $\epsilon$  denotes the maximal, or worse case distortion in distances between all pairs of data points. In other  
1222 words, the JL lemma tells us that, for random projections to preserve the geometry of a dataset up to some  
1223 level of tolerance  $\epsilon$  in the fractional error of pairwise distances, it is sufficient to scale the dimensionality  $M$   
1224 of the projected subspace as  $1/\epsilon^2$  and only as the *logarithm* of the number of data points,  $P$ .

1225 While proven initially for sets of arbitrary data points, the JL lemma has also been extended to datasets  
1226 with known prior structures. One such extension considers points occupying a  $D$ -dimensional linear sub-  
1227 space of the full  $N$ -dimensional space [Indyk and Motwani, 1998]. The corresponding condition to preserve  
1228 the geometry of a dataset up to a maximal distortion level  $\epsilon$  requires the projected subspace dimension  $M$  to  
1229 scale as

$$M \sim \mathcal{O}\left(\frac{D}{\epsilon^2}\right) + \mathcal{O}\left(\frac{1}{\epsilon^2} \log \frac{1}{\rho}\right).$$

1230 Note that a subspace of dimension  $D$  is extremely “large”, in the sense that if one wishes to fill a ball  
1231 of any given radius within the subspace with a cloud of points at a fixed density, the requisite number of  
1232 points would have to scale *exponentially* with  $D$ . This phenomenon is one manifestation of the curse of  
1233 dimensionality; adequate exploration through sampling of a space of dimension  $D$ , without missing any  
1234 regions, requires a number of samples that grows exponentially with  $D$ . However, despite this curse of  
1235 dimensionality, the number of random projections  $M$  required to preserve the geometry of *all* pairs of points  
1236 within a subspace of dimension  $D$  at some fixed distortion  $\epsilon$ , need only scale *linearly* with  $D$ . Roughly,  
1237 the subspace JL lemma follows from the pointwise JL lemma by making the replacements  $P \rightarrow e^D$  and  
1238  $\log P \rightarrow D$ . In this sense they are consistent with each other.

1239 A similar extension considers data points sampled from a low  $K$ -dimensional non-linear manifold with  
1240 a finite volume  $V$  embedded in an  $N$ -dimensional space [Baraniuk and Wakin, 2007]. The sufficient con-  
1241 dition to preserve the geometric structure of the data to within fractional distortion  $\epsilon$  requires the subspace  
1242 dimension  $M$  to scale as,

$$M \sim \mathcal{O}\left(\frac{1}{\epsilon^2} \log \frac{1}{\rho} \left(\log V + K \log N + K \log \frac{R}{\tau \epsilon}\right)\right).$$

1243 This scaling is similar to the linear subspace case, as it grows logarithmically with the volume of the man-  
1244 ifold. Given that the volume of a manifold grows exponentially with the intrinsic dimension ( $\log V \propto K$ ),  
1245 the scaling of  $M$  is, in fact, linear in the dataset's intrinsic dimension  $K$ . Different from the previous two  
1246 cases, however, the random projection of manifolds includes an addition dependency on the embedding di-  
1247 mensionality,  $N$ , which we will check in the next section with simulations. The condition number  $\tau$  and  
1248 geodesic covering regularity  $R$  characterizes the curvature of the nonlinear manifold, which are properties  
1249 of the manifold's geometry.

1250 These theoretical results all suggest that random projections yield extremely efficient representations of  
1251 high-dimensional data, as long as the number of coefficients in the reduced representation grows logarithmi-  
1252 cally with the amount of data. With different theorems, this amount of data is measured in different ways: by



1253 the number of data points in the JL lemma, by the exponentiated subspace dimension for linear subspaces,  
1254 and by the volume of a nonlinear manifold.

1255 In the main paper, we argue that, in many scenarios, random projection theory constitutes a good model  
1256 of the process of neural measurement of a random subset of  $M$  neurons. Conceptually, the process of  
1257 projecting high-dimensional data points into a randomly generated low-dimensional subspace in a random  
1258 and data-blind way is similar to the random sampling of the high-dimensional patterns of neural activity  
1259 across all  $N$  neurons in a circuit, down to a random subset of  $M$  neurons that happen to be measured in a  
1260 single experiment. Indeed, when the full  $N$ -dimensional neural activity patterns are randomly oriented with  
1261 respect to the single neuron axes, the neuroscientists' act of random sampling is exactly equivalent to the  
1262 mathematical procedure of a random projection.

1263 To see this equivalence, consider a full-dimensional dataset denoted as the  $N$ -by- $N^T$  data matrix  $\mathbf{X}$ .  
1264 If we force the data to be randomly oriented by applying a random orthogonal rotation to obtain a rotated  
1265 dataset,  $\mathbf{UX}$ , the random sampling of its rows is mathematically equivalent to the random projection of  
1266 the original data with the sampled rows of  $\mathbf{U}$  as the projection's basis. Consequently, the attractive scaling  
1267 laws governing the requisite number of random projections  $M$  to achieve a desired distortion  $\epsilon$  can be  
1268 directly translated into scaling laws governing the required number of neurons to record in order to achieve a  
1269 given desired accuracy of the resultant dynamic portraits of circuit computation obtained via dimensionality  
1270 reduction. Of course, this equivalence comes with the caveat that neural activity patterns should be randomly  
1271 oriented with respect to the single neuron axes. In such a scenario, neural activity patterns are distributed,  
1272 or exhibit mixed selectivity in which many neurons code for many task parameters. A major departure from  
1273 this assumption is a high degree of sparsity, and we will investigate the effects of sparsity using simulations  
1274 below.

## 1275 **V.II Numerical analysis of scaling behavior a random projection theory of measurement**

1276 Since, as nonlinear representations of stimulus or behavioral variables, trial-averaged neural data can be  
1277 best described as nonlinear manifolds embedded in the full  $N$ -dimensional firing rate space of all neurons  
1278 in the circuit, we verify the scaling laws of the random projection of smooth manifolds in this section using  
1279 simulations. We further aim to make the proportionality constants concrete in the sufficient condition for  
1280 accurate recovery,

$$M = \frac{1}{\epsilon^2} (c_1 \log \text{NTC} + c_2 K \log N + c_3 K), \quad (27)$$

1281 where we replaced the manifold volume,  $V$ , with NTC, since they are scaled versions of each other. Because  
1282 NTC scales exponentially with the intrinsic dimensionality,  $K$ , this sufficient target dimension  $M$  is still  
1283 linearly proportional to  $K$ .

1284 We first check the scaling against  $\log \text{NTC}$  using simulated data from one- and two-dimensional smooth  
1285 manifolds generated using Gaussian processes. With the kernel's characteristic time scale fixed at,  $\tau = 12$ ,  
1286 the NTCs for the 1D and the 2D cases are simply  $\sqrt{\frac{2}{\pi}} \frac{T}{\tau}$  and  $\frac{2}{\pi} \frac{T^2}{\tau^2}$  (the 2D Gaussian process has a factored  
1287 kernel), where  $T$  is the range of the task parameters. In both cases, we embedded the generated random  
1288 manifold in a 1,000-dimensional space, and computed the maximal pairwise distortions,  $\max_{t_{1,2}} d_{t_{1,2}}$ , for  
1289 all possible pairwise distances under random projections of different  $M$ s and of different NTCs (by varying  
1290  $T$  from 4 to 100). For each combinations of  $M$  and NTC, we computed the maximal distortion over 100  
1291 trials, and used the 95 percentile ( $\rho = 0.05$ ) of all the maximal distortions as the value for  $\epsilon$ .

1292 With the distortion,  $\epsilon$ , plotted in the  $M$ -vs- $\log \text{NTC}$  plane, we highlighted values of  $M$  for three different  
1293 distortion levels,  $\epsilon = 0.2, 0.3, 0.4$ , at different NTCs, and obtained excellent linear fits of the corresponding  
1294 constant-distortion contours as predicted (Supplementary Fig. 12A). Furthermore, with a renormalization of

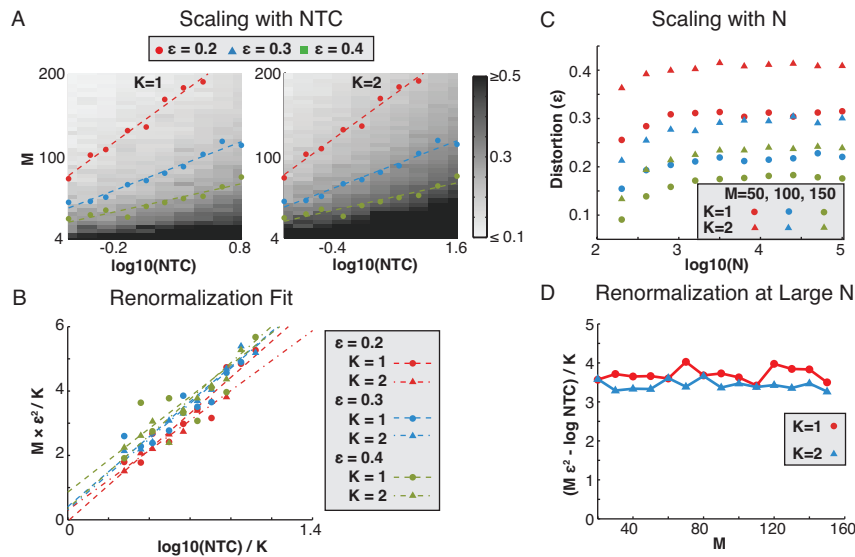

**Supplementary Figure 12:** Random projections of simulated smooth manifold. **A.** Simulated distortions,  $\epsilon$  with  $\rho = 0.05$ , of smooth random manifolds generated using 1D and 2D (factored kernel) Gaussian processes. Distortions are plotted in the plane of the number of recorded neuron,  $M$ , versus the logarithm of the NTC. Locations of exemplar distortions,  $\epsilon = 0.2, 0.3, 0.4$  are highlighted and fitted with linear functions of  $\log$  NTC. **B.** Fitted constant-distortion contours on rescaled x and y axes to extract the parameter  $c_1$ . **C.** Distortion's saturation as a function of the embedding dimension,  $N$ , for 1D and 2D manifolds with  $M = 50, 100, 150$ . **D.** Offset and rescaled distortions as a function of  $M$  in the limit of large  $N = 100,000$ .

1295 the highlighted  $M$  values by  $K/\epsilon^2$ , the fitted linear functions of  $\log$  NTC/ $K$  under different parameter combinations have similar slopes, or  $c_1$  (Supplementary Fig. 12B). Indeed, the slopes fitted using 1D manifolds  
 1296 have an average of  $1.07 \pm 0.07$ , which is within the region of uncertainty for the average slopes fitted using  
 1297 2D manifolds,  $1.05 \pm 0.11$ .  
 1298

1299 Next, we check the scaling of  $M$  with the dimension of the embedding space,  $N$ . Since simulations become very expensive for high embedding dimensions, we compute the distortions under just three values of  
 1300  $M = 50, 100, 150$  for embedding dimensions ranging logarithmically from 200 to 100,000 (Supplementary  
 1301 Fig. 12C). While the simulated distortions seem to increase linearly with  $\log N$  initially, as the embedding  
 1302 dimension becomes large ( $N \sim 10,000$ ), the distortion  $\epsilon$  derived from simulations saturate to a constant  
 1303 in each case. While seemingly contradictory, the theory isn't falsified since it provides only a *sufficient*  
 1304 condition on the scaling of  $M$ , and would be consistent with any scaling that is better than  $\log N$  (Eq 27).  
 1305

1306 So what happens at large  $N$ ? Can we tighten the published sufficient condition to better describe our  
 1307 simulations of the random projection of smooth manifolds? Given our observation of the saturating behavior,  
 1308 a simple modification of the scaling law is to simply replace the  $\log N$  term with a constant, which we  
 1309 combine with  $c_3$  to obtain the following simplified scaling law,

$$M = \frac{1}{\epsilon^2} (\log \text{NTC} + c_0 K). \quad (28)$$

1310 In this new formula, we have also replaced the  $c_1$  term with our fitted value of 1. Given this hypothetical  
 1311 relation, the constant  $c_0$  must then equal to  $\frac{1}{K} (\epsilon^2 M - \log \text{NTC})$  for large  $N$ . To check its validity, we

1312 simulated additional 1D and 2D manifolds in 100,000-dimensional embedding spaces with values of  $M$   
1313 varies more densely from 10 to 150 (Supplementary Fig. 12D). Remarkably, for combinations of different  
1314  $M$  and  $K$  values, the resulting values of  $c_0$  remain extremely steady around a value of  $3.5 \pm 0.2$ , consistent  
1315 with our simplified scaling law.

### 1316 V.III Scaling of distortion with neural sparsity

1317 While random projection and random sampling are mathematically equivalent when the neural activities are  
1318 randomly oriented with respect to the neuronal axes, actual neural data may be more sparse and preferentially  
1319 oriented along the neuronal axes. To quantify how distributed or sparse a set of  $M$ -dimensional population  
1320 activities are, we use a measure called data coherence, which, for the  $M$ -by- $N^T$  data matrix  $\mathbf{X}$ , is defined  
1321 as,

$$\left\langle \frac{\max_i |\mathbf{X}_{it}|}{\|\mathbf{X}_{*t}\|_2} \right\rangle_t, \quad (29)$$

1322 where  $\mathbf{X}_{*t}$  denotes the  $t$ th column vector of the data matrix. Algebraically, the data coherence measure  
1323 averages the individual column vectors' sparsity, which is defined as the ratio of the vector's coordinate with  
1324 the maximal magnitude to its norm. Conceptually, the data coherence measure quantifies a dataset's sparsity  
1325 by computing its mutual coherence—a concept widely utilized in the compressive sensing literature—with  
1326 respect to the neuronal basis. Numerically, this measure of sparsity varies from 1 for a perfectly sparse  
1327 dataset, where only a single neuron is active in any recorded population activity pattern, to  $1/\sqrt{M}$  for a  
1328 distributed dataset, where components of the population activity are evenly distributed across neurons. The  
1329 chance level coherence of a zero mean unit variance random gaussian dataset is roughly  $\sqrt{2 \log M}$ , which  
1330 is the expected maximum for the absolute values of  $M$  zero mean unit-variance gaussian random variables.  
1331 Note that for the same underlying network size,  $N$ , the data coherence measure may change depending on  
1332 the number of recorded neurons.

1333 To investigate how sparsity affects the number of required neurons for the accurate recovery of dynamical  
1334 portraits under subsampling, we use simulations of nonlinear neural networks whose activities patterns'  
1335 sparsity can be controlled. The simulated recurrent nonlinear neural networks evolve according to the fol-  
1336 lowing differential equation,

$$\frac{d\mathbf{x}_t}{dt} = -\mathbf{x}_t + g\mathbf{W}f(\mathbf{x}_t) + \boldsymbol{\eta}_t, \quad (30)$$

1337 where the state of the  $N$  neurons in the network at time  $t$  is represented by the vector  $\mathbf{x}_t$ . Neuronal dynamics  
1338 is modeled using the soft-thresholding nonlinearity,

$$f(x) = \log(1 + e^{x-1}),$$

and produces outputs which are then fed through the connectivity matrix  $\mathbf{W}$  with some gain factor  $g$  into  
the rest of the network. The network is driven by random  $N$ -dimensional pink noise,  $\boldsymbol{\eta}_t$ , smoothed with a  
gaussian kernel of a width of 5ms. For the network dynamics to dominate the neuronal dynamics, we fix  $g$   
at 0.99 for our simulations. To control the sparsity of the simulated activities, we manipulate the sparsity of  
the connectivity matrix using the following formula,

$$W = V\Lambda^\alpha V^\dagger, \quad 0 \leq \alpha \leq 1,$$

1339 where the product of  $V\Lambda^\alpha V^\dagger$  is the eigen-decomposition of a randomly generated orthogonal matrix obtained  
1340 from applying the Gram-Schmidt procedure to a random gaussian matrix. The parameter  $\alpha$  corresponds to  
1341 an element-wise exponentiation of the decomposition's eigenvalues, which are pure imaginary numbers.

1342 As  $\alpha$  varies from 0 to 1,  $W$  transitions smoothly from the sparse identity matrix to a distributed random  
1343 orthogonal matrix, generating neural activity patterns of varying sparsity.

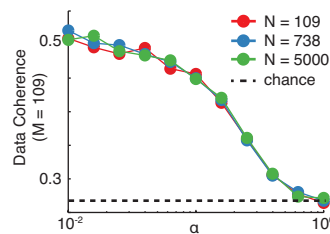

**Supplementary Figure 13:** Relation between the parameter  $\alpha$  and the resulting data coherence measured with a subset of 109 neurons for different network sizes.

1344 We empirically mapped the relation between the parameter  $\alpha$  to the simulated activities' data coherence  
1345 with networks of different sizes 109, 738, and 5000 run with values  $\alpha$  varied logarithmically from 0.01  
1346 to 1 (Supplementary Fig. 13). When measured with a fixed 109 number of neurons (same as monkey H),  
1347 the measured coherences of samples activities depended only on the parameter  $\alpha$  but not the network size,  
1348 suggesting that modifying the value of  $\alpha$  is a controlled way of exploring data coherence without affecting  
1349 other properties of the simulated neural activity patterns. For the rest of this section, we compare random  
1350 samplings of simulated activities with coherences of either 0.27 or 0.55 inclusive of observed coherence in  
1351 data (0.34 for monkey H and 0.43 for monkey G).

1352 Applying both random samplings and random projections to the simulated dataset, we explored their  
1353 resulting distortions in the  $M$ -by- $\log T$  plane, and fitted to them constant distortion contours of the same  
1354 three levels (Figure 4B,C). The excellent linear fits of  $M$  against  $\log T$  across data coherences for both  
1355 random projections and random sampling reaffirms that the logarithmic scaling of the requisite number of  
1356 neurons is a robust phenomenon that persists across a large range of sparsity levels of neural activity patterns.

1357 Furthermore, comparing results in the case where simulated neural activity patterns are randomly dis-  
1358 tributed (data coherence = 0.27, leftmost panels, Figure 4A,B,C,D), we see no difference between the req-  
1359 uisite number of neurons for random sampling and the requisite subspace dimension for random projection,  
1360 verifying the intuitive connection we've made between the two for randomly oriented activity patterns. The  
1361 increase in the number of requisite neurons relative to the number of random projections only starts to ap-  
1362 pear as simulated neural activity patterns become more sparse, in agreement with the small discrepancy  
1363 observed in the motor cortical data (Figure 3H) where neural activities have less-than-random orientations  
1364 with respect to the neuronal axes as reflected by their higher data coherence ( $0.32 > 0.27$ ).

1365 More quantitatively, we compared, for the distortion value of 0.3, the slopes (increase in the requisite  
1366 number of neurons or random subspace dimension for every 10-fold increase in volume) and intercepts  
1367 (the minimal number of neuron or subspace dimension) of the  $M$  versus  $\log T$  fits as functions of data  
1368 coherence for random sampling and random projection. We see that the slopes and intercepts in the case of  
1369 random sampling increased systematically with data coherence, or sparsity, reflecting the increased chance  
1370 of missing "important" neurons as trajectories become sparser (Figures 3A,B). However, at data coherence  
1371 levels around the value observed in our motor cortical dataset, the increases in both the fitted slope and  
1372 intercept are quite small, suggesting that the motor cortical data are not far from being randomly oriented.  
1373 On the other hand, because random projection always results in subspaces that are, by definition, randomly  
1374 oriented with respect to any chosen basis of the firing-rate space, neither the fitted slopes nor the intercepts  
1375 have a dependency on the simulated activities' data coherence. This behavior is consistent with the fact that

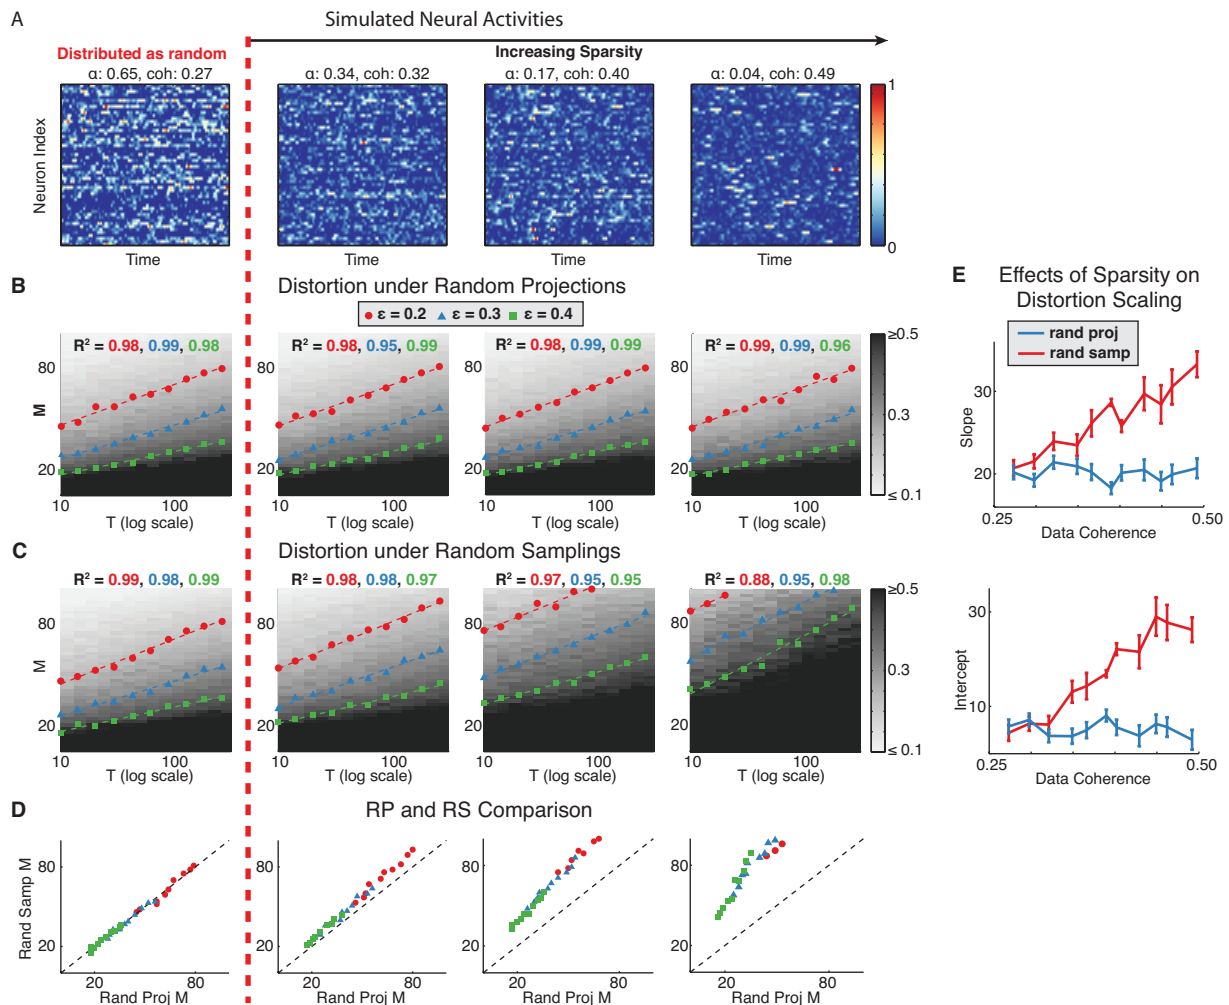

Figure 14: **Effect of sparsity** **A**. Example firing rates of simulated networks with different levels of sparsity; **B**. Constant distortion contours for the simulated activities under random projection; **C**. Constant distortion contours for simulated activities under random sampling; **D**. Comparisons of the requisite number of neurons under random projections and random samplings. **E**. Fitted slopes and intercepts of constant distortion contours as functions of data coherence. Error bars correspond to standard errors of the fitted parameters.

1376 properties other than sparsity are well controlled in our simulations.

1377 Overall, analysis of simulated data suggests that the optimistic result that the number of recorded neu-  
 1378 rons need only scale logarithmically with the neural task complexity to achieve a fixed distortion in neural  
 1379 state space dynamics, holds true for a broad range of sparsities of neural activity patterns. The actual req-  
 1380 uisite number of neurons grows with increasing sparsity, but the linear relation between  $M$  and  $\log$  NTC  
 1381 is preserved. While we support this conclusion using simulation results, it is a highly plausible theoretical  
 1382 conjecture as well. In fact, recent theoretical progress has been made to extend the basic JL lemma beyond

1383 random projections into cases where the projection vectors are sparse [Achlioptas, 2003, Li et al., 2006],  
1384 including random sampling.

## 1385 **References**

1386 [Achlioptas, 2003] Achlioptas, D. (2003). Database-friendly random projections: Johnson-Lindenstrauss  
1387 with binary coins. *Journal of Computer and System Sciences*, 66(4).

1388 [Assisi et al., 2007] Assisi, C., Stopfer, M., Laurent, G., and Bazhenov, M. (2007). Adaptive regulation of  
1389 sparseness by feedforward inhibition. *Nature neuroscience*, 10(9):1176–1184.

1390 [Baraniuk and Wakin, 2007] Baraniuk, R. G. and Wakin, M. B. (2007). Random projections of smooth  
1391 manifolds. *Foundations of Computational Mathematics*, 9.

1392 [Bathellier et al., 2008] Bathellier, B., Buhl, D. L., Accolla, R., and Carleton, A. (2008). Dynamic ensemble  
1393 odor coding in the mammalian olfactory bulb: sensory information at different timescales. *Neuron*,  
1394 57(4):586–598.

1395 [Briggman et al., 2006] Briggman, K. L., Abarbanel, H. D., and Kristan, W. B. (2006). From crawling  
1396 to cognition: analyzing the dynamical interactions among populations of neurons. *Current opinion in*  
1397 *neurobiology*, 16(2):135–144.

1398 [Bromberg-Martin et al., 2010] Bromberg-Martin, E. S., Hikosaka, O., and Nakamura, K. (2010). Coding  
1399 of task reward value in the dorsal raphe nucleus. *The Journal of neuroscience : the official journal of the*  
1400 *Society for Neuroscience*, 30(18):6262–6272.

1401 [Chapin and Nicolelis, 1999] Chapin, J. and Nicolelis, M. (1999). Principal component analysis of neu-  
1402 ronal ensemble activity reveals multidimensional somatosensory representations. *Journal of neuroscience*  
1403 *methods*, 94(1):121–140.

1404 [Churchland et al., 2012] Churchland, M. M., Cunningham, J. P., Kaufman, M. T., Foster, J. D., Nuy-  
1405 jukian, P., Ryu, S. I., and Shenoy, K. V. (2012). Neural population dynamics during reaching. *Nature*,  
1406 487(7405):51–56.

1407 [Clarkson, 2008] Clarkson, K. L. (2008). Tighter bounds for random projections of manifolds. In *Proceed-*  
1408 *ings of the Twenty-fourth Annual Symposium on Computational Geometry*, SCG '08, pages 39–48, New  
1409 York, NY, USA. ACM.

1410 [Cunningham and Yu, 2014] Cunningham, J. P. and Yu, B. M. (2014). Dimensionality reduction for large-  
1411 scale neural recordings. *Nature neuroscience*.

1412 [Dasgupta and Gupta, 2003] Dasgupta, S. and Gupta, A. (2003). An elementary proof of a theorem of  
1413 johnson and lindenstrauss. *Random Structures and Algorithms*, 22.

1414 [Ganguli et al., 2008a] Ganguli, S., Bisley, J., Roitman, J., Shadlen, M., Goldberg, M., and Miller, K.  
1415 (2008a). One-dimensional dynamics of attention and decision making in lip. *Neuron*, 58(1):15–25.

1416 [Ganguli et al., 2008b] Ganguli, S., Huh, D., and Sompolinsky, H. (2008b). Memory traces in dynamical  
1417 systems. *Proc. Natl. Acad. Sci.*, 105(48):18970.

- 1418 [Gao and Ganguli, 2015] Gao, P. and Ganguli, S. (2015). On simplicity and complexity in the brave new  
1419 world of large-scale neuroscience. *Current opinion in neurobiology*, 32:148–155.
- 1420 [Gray, 1972] Gray, R. (1972). On the asymptotic eigenvalue distribution of toeplitz matrices. *IEEE Trans-*  
1421 *actions on Information Theory*, 18.
- 1422 [Haddad et al., 2010] Haddad, R., Weiss, T., Khan, R., Nadler, B., Mandairon, N., Bensafi, M., Schneidman,  
1423 E., and Sobel, N. (2010). Global features of neural activity in the olfactory system form a parallel code  
1424 that predicts olfactory behavior and perception. *The Journal of neuroscience : the official journal of the*  
1425 *Society for Neuroscience*, 30(27):9017–9026.
- 1426 [Hegd e and Van Essen, 2004] Hegd e, J. and Van Essen, D. C. (2004). Temporal dynamics of shape analysis  
1427 in macaque visual area v2. *Journal of neurophysiology*, 92(5):3030–3042.
- 1428 [Hubel and Wiesel, 1959] Hubel, D. H. and Wiesel, T. N. (1959). Receptive fields of single neurones in the  
1429 cat’s striate cortex. *The Journal of physiology*, 148(3):574–591.
- 1430 [Indyk and Motwani, 1998] Indyk, P. and Motwani, R. (1998). Approximate nearest neighbors: towards  
1431 removing the curse of dimensionality.
- 1432 [Johnson and Lindenstrauss, 1984] Johnson, W. and Lindenstrauss, J. (1984). Extensions of lipschitz maps  
1433 into a hilbert space. *Contemporary Mathematics*, 26:189–206.
- 1434 [Kim et al., 2012] Kim, S. M., Ganguli, S., and Frank, L. M. (2012). Spatial information outflow from the  
1435 hippocampal circuit: distributed spatial coding and phase precession in the subiculum. *The Journal of*  
1436 *neuroscience*, 32(34):11539–11558.
- 1437 [Li et al., 2006] Li, P., Hastie, T. J., and Church, K. W. (2006). Very sparse random projections. In *Pro-*  
1438 *ceedings of the 12th ACM SIGKDD International Conference on Knowledge Discovery and Data Mining,*  
1439 *KDD ’06*, pages 287–296, New York, NY, USA. ACM.
- 1440 [Machens et al., 2010] Machens, C. K., Romo, R., and Brody, C. D. (2010). Functional, but not anatomical,  
1441 separation of ”what” and ”when” in prefrontal cortex. *The Journal of neuroscience : the official journal*  
1442 *of the Society for Neuroscience*, 30(1):350–360.
- 1443 [Mante et al., 2013] Mante, V., Sussillo, D., Shenoy, K. V., and Newsome, W. T. (2013). Context-dependent  
1444 computation by recurrent dynamics in prefrontal cortex. *Nature*.
- 1445 [Marchenko and Pastur, 1967] Marchenko, V. and Pastur, L. (1967). Distribution of eigenvalues for some  
1446 sets of random matrices. *Matematicheskii Sbornik*, 114(4):507–536.
- 1447 [Matsumoto et al., 2005] Matsumoto, N., Okada, M., Yasuko, S., Yamane, S., and Kawano, K. (2005).  
1448 Population dynamics of face-responsive neurons in the inferior temporal cortex. *Cerebral cortex (New*  
1449 *York, N.Y. : 1991)*, 15(8):1103–1112.
- 1450 [Mazor and Laurent, 2005] Mazor, O. and Laurent, G. (2005). Transient dynamics versus fixed points in  
1451 odor representations by locust antennal lobe projection neurons. *Neuron*, 48(4):661–673.
- 1452 [Moreno-Bote et al., 2014] Moreno-Bote, R., Beck, J., Kanitscheider, I., Pitkow, X., Latham, P., and Pouget,  
1453 A. (2014). Information-limiting correlations. *Nature neuroscience*.

- 1454 [Narayanan and Laubach, 2009] Narayanan, N. S. and Laubach, M. (2009). Delay activity in rodent frontal  
1455 cortex during a simple reaction time task. *Journal of neurophysiology*, 101(6):2859–2871.
- 1456 [Paz et al., 2005] Paz, R., Natan, C., Boraud, T., Bergman, H., and Vaadia, E. (2005). Emerging patterns  
1457 of neuronal responses in supplementary and primary motor areas during sensorimotor adaptation. *The*  
1458 *Journal of neuroscience : the official journal of the Society for Neuroscience*, 25(47):10941–10951.
- 1459 [Peyrache et al., 2009] Peyrache, A., Khamassi, M., Benchenane, K., Wiener, S. I., and Battaglia, F. P.  
1460 (2009). Replay of rule-learning related neural patterns in the prefrontal cortex during sleep. *Nature*  
1461 *neuroscience*, 12(7):919–926.
- 1462 [Raman et al., 2010] Raman, B., Joseph, J., Tang, J., and Stopfer, M. (2010). Temporally diverse firing  
1463 patterns in olfactory receptor neurons underlie spatiotemporal neural codes for odors. *The Journal of*  
1464 *neuroscience : the official journal of the Society for Neuroscience*, 30(6):1994–2006.
- 1465 [Raposo et al., 2014] Raposo, D., Kaufman, M. T., and Churchland, A. K. (2014). A category-free neural  
1466 population supports evolving demands during decision-making. *Nature neuroscience*.
- 1467 [Reike et al., 1996] Reike, F., Warland, D., van Steveninck, R., and Bialek, W. (1996). *Spikes: Exploring*  
1468 *the Neural Code*. MIT Press.
- 1469 [Rigotti et al., 2013] Rigotti, M., Barak, O., Warden, M. R., Wang, X. J., Daw, N. D., Miller, E. K., and Fusi,  
1470 S. (2013). The importance of mixed selectivity in complex cognitive tasks. *Nature*, 497(7451):585–590.
- 1471 [Sadtlter et al., 2014] Sadtlter, P. T., Quick, K. M., Golub, M. D., Chase, S. M., Ryu, S. I., Tyler-Kabara,  
1472 E. C., Byron, M. Y., and Batista, A. P. (2014). Neural constraints on learning. *Nature*, 512(7515):423–  
1473 426.
- 1474 [Sasaki et al., 2007] Sasaki, T., Matsuki, N., and Ikegaya, Y. (2007). Metastability of active CA3 networks.  
1475 *The Journal of neuroscience : the official journal of the Society for Neuroscience*, 27(3):517–528.
- 1476 [Shepherd, 2004] Shepherd, G. M. (2004). *The synaptic organization of the brain*, volume 3. Oxford  
1477 University Press New York.
- 1478 [Stevenson and Kording, 2011] Stevenson, I. H. and Kording, K. P. (2011). How advances in neural record-  
1479 ing affect data analysis. *Nature neuroscience*, 14(2):139–142.
- 1480 [Stopfer et al., 2003] Stopfer, M., Jayaraman, V., and Laurent, G. (2003). Intensity versus identity coding  
1481 in an olfactory system. *Neuron*, 39(6):991–991004.
- 1482 [Strang and Aarikka, 1986] Strang, G. and Aarikka, K. (1986). *Introduction to applied mathematics*, vol-  
1483 ume 16. Wellesley-Cambridge Press Wellesley, MA.
- 1484 [Strong et al., 1998] Strong, S. P., Koberle, R., van Steveninck, R. R. d. R., and Bialek, W. (1998). Entropy  
1485 and information in neural spike trains. *Physical review letters*, 80(1):197.
- 1486 [Sussillo and Abbott, 2012] Sussillo, D. and Abbott, L. (2012). Transferring learning from external to in-  
1487 ternal weights in echo-state networks with sparse connectivity.
- 1488 [Thacker and Bromiley, 2001] Thacker, N. A. and Bromiley, P. A. (2001). The effects of a square root  
1489 transform on a poisson distributed quantity. *Tina memo*, 10.



1490 [Valiant, 2005] Valiant, L. G. (2005). Memorization and association on a realistic neural model. *Neural*  
1491 *computation*, 17(3):527–555.

1492 [Warden and Miller, 2010] Warden, M. R. and Miller, E. K. (2010). Task-dependent changes in short-term  
1493 memory in the prefrontal cortex. *The Journal of neuroscience : the official journal of the Society for*  
1494 *Neuroscience*, 30(47):15801–15810.

1495 [Yu et al., 2007] Yu, B. M., Kemere, C., Santhanam, G., Afshar, A., Ryu, S. I., Meng, T. H., Sahani, M.,  
1496 and Shenoy, K. V. (2007). Mixture of trajectory models for neural decoding of goal-directed movements.  
1497 *Journal of neurophysiology*, 97(5):3763–3780.

## 1498 Appendix

### 1499 Analytical expressions for fraction of variance explained

For the exponential correlation function,  $\hat{f}(\omega)$  evaluates to,

$$\begin{aligned}\hat{f}(\omega) &= \sum_{t=-\infty}^{t=\infty} e^{-|t|/\tau} e^{i\omega t} \\ &= \frac{1 - e^{-\frac{2}{\tau}}}{1 - 2 \cos(\omega) e^{-\frac{1}{\tau}} + e^{-\frac{2}{\tau}}}\end{aligned}$$

Taking advantage of  $\hat{f}(\omega)$ 's ordering, we evaluate the integral,

$$\int_{-\omega^*}^{\omega^*} d\omega \hat{f}(\omega) = 4 \arctan \left( \frac{\tan(\omega^*/2)}{\tanh(1/2\tau)} \right).$$

The minimum  $\omega^*$  given the fraction parameter  $r$  is then,

$$\omega^* = 2 \arctan \left[ \tanh(1/2\tau) \tan \left( \frac{\pi r}{2} \right) \right]$$

With the  $\tau \gg 1$ , we ignore terms beyond  $\mathcal{O}(1/\tau)$  to obtain the clean, final expression,

$$\begin{aligned}D(r) &= \frac{1}{\pi} \arctan \left[ \tanh(1/2\tau) \tan \left( \frac{\pi r}{2} \right) \right] \\ &\approx \tan \left( \frac{\pi r}{2} \right) \frac{1}{\pi} \frac{T}{\tau} \quad \text{(keeping } \mathcal{O}(\frac{1}{\tau})\text{)}\end{aligned}$$

For the gaussian temporal correlation function, we state without showing that the Fourier transform is in fact nicely ordered. To compute the fraction of variance explained, we switch the order of the summation over  $t$  and the integration of  $\omega$  to obtain,

$$\begin{aligned}\int_{-\omega^*}^{\omega^*} d\omega \hat{f}(\omega) &= \sum_{t=-\infty}^{\infty} e^{-t^2/\tau^2} \int_{-\pi}^{\pi} d\omega e^{i\omega t} \\ &= \sum_{t=-\infty}^{\infty} e^{-t^2/\tau^2} \frac{2 \sin(\omega^* t)}{t} \\ &\approx 2\pi \operatorname{erf}(\omega^* \tau/2) \quad (\tau \gg 1, \text{ Summation by integration})\end{aligned}$$

With the optimal  $\omega^* \approx 2 \operatorname{inverf}(r)/\tau$ , we then have the final expression,

$$D(r) \approx \operatorname{inverf}(r) \frac{2T}{\pi \tau}$$
